# Supplementary material for: Exposure to hot and cold temperatures and ambulance attendances in Brisbane, Australia: a time-series study
Source: PubMed Central journal article supplement — BMJ Open. 2012 Jul 7;2(4):e001074. doi: 10.1136/bmjopen-2012-001074 (PMC3400068; doi:10.1136/bmjopen-2012-001074), 2012-07-07
Supplement: bmjopen-2012-001074-s2.pdf [file bmjopen-2012-001074-s2.pdf]

Table 3: Unadjusted temperature effects on ambulance attendances in Brisbane, Australia. Effects given as percent change per 1 °C above or below threshold (Threshold stated in brackets for each category)

|             | Lag in days | Attendance category (95% C.I) |                          |                          |                               |
|-------------|-------------|-------------------------------|--------------------------|--------------------------|-------------------------------|
|             |             | Total (22 °C)                 | Cardiovascular (22 °C)   | Respiratory (22 °C)      | Other (15.5/28 °C)            |
| Heat effect | 0-1         | <b>1.51 (0.54, 2.49)</b>      | 0.81 (-0.15, 1.77)       | 0.29 (-0.93, 1.51)       | <b>23.52 (13.23, 34.31)</b>   |
|             | 2-15        | -0.49 (-1.96, 0.99)           | -1.25 (-2.70, 0.21)      | -1.16 (-3.00, 0.69)      | <b>-27.55 (-53.20, -1.41)</b> |
|             | 16-27       | 1.02 (-0.21, 2.24)            | 1.12 (-0.09, 2.33)       | <b>1.89 (0.36, 3.43)</b> | -0.95 (-23.62, 22.16)         |
| Cold effect | 0-1         | -0.57 (-1.27, 0.14)           | -0.68 (-1.36, 0.01)      | -0.03 (-0.81, 0.75)      | <b>-3.52 (-6.61, -0.39)</b>   |
|             | 2-15        | 0.86 (-0.22, 1.93)            | <b>1.71 (0.66, 2.76)</b> | <b>3.83 (2.63, 5.02)</b> | -0.97 (-5.82, 3.89)           |
|             | 16-27       | <b>1.10 (0.26, 1.93)</b>      | 0.08 (-0.73, 0.90)       | <b>2.79 (1.86, 3.72)</b> | <b>5.81 (1.60, 10.03)</b>     |
