# Supplementary material for: Exposure to hot and cold temperatures and ambulance attendances in Brisbane, Australia: a time-series study
Source: PubMed Central journal article supplement — BMJ Open. 2012 Jul 7;2(4):e001074. doi: 10.1136/bmjopen-2012-001074 (PMC3400068; doi:10.1136/bmjopen-2012-001074), 2012-07-07
Supplement: bmjopen-2012-001074.draft_revisions.pdf [file bmjopen-2012-001074.draft_revisions.pdf]

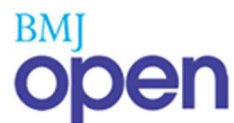

**Exposure to hot and cold temperatures and ambulance attendances in Brisbane, Australia: A time series study**

|                                 |                                                                                                                                                                                                                                                     |
|---------------------------------|-----------------------------------------------------------------------------------------------------------------------------------------------------------------------------------------------------------------------------------------------------|
| Journal:                        | <i>BMJ Open</i>                                                                                                                                                                                                                                     |
| Manuscript ID:                  | bmjopen-2012-001074                                                                                                                                                                                                                                 |
| Article Type:                   | Research                                                                                                                                                                                                                                            |
| Date Submitted by the Author:   | 29-Feb-2012                                                                                                                                                                                                                                         |
| Complete List of Authors:       | Turner, Lyle; Queensland University of Technology, School of Public Health and Social Work<br>Connell, Des; Griffith University, School of Environment<br>Tong, Shilu; Queensland University of Technology, School of Public Health and Social Work |
| <b>Primary Subject Heading</b>: | Occupational and environmental medicine                                                                                                                                                                                                             |
| Secondary Subject Heading:      | Epidemiology, Health policy, Public health                                                                                                                                                                                                          |
| Keywords:                       | PUBLIC HEALTH, ACCIDENT & EMERGENCY MEDICINE, EPIDEMIOLOGY                                                                                                                                                                                          |
|                                 |                                                                                                                                                                                                                                                     |

SCHOLARONE™  
Manuscripts

Peer Review Only

1  
2  
3 **Type of Manuscript:** Research article  
4

5  
6 **Title:** Exposure to hot and cold temperatures and ambulance attendances in Brisbane,  
7

8 **Australia: A time series study**  
9

10  
11 **Authors:** Lyle R Turner<sup>1</sup>, Des Connell<sup>2</sup>, Shilu Tong<sup>1</sup>  
12

13  
14 **Author Affiliations:**  
15

16  
17 1. School of Public Health and Social Work, Institute of Health and Biomedical Innovation,  
18  
19 Queensland University of Technology, Brisbane, Australia  
20

21  
22 2. School of Environment, Griffith University, Brisbane, Australia  
23

24  
25 **Corresponding Author:**  
26

27  
28 Dr. Shilu Tong  
29

30  
31 School of Public Health and Social Work, Institute of Health and Biomedical Innovation  
32

33  
34 Queensland University of Technology  
35

36  
37 Victoria Park Road  
38

39  
40 Kelvin Grove, QLD 4059  
41

42  
43 Australia  
44

45  
46 Telephone: +61 7 3138 9745  
47

48  
49 Fax: +61 7 3138 3369  
50

51  
52 Email: s.tong@qut.edu.au  
53  
54  
55  
56  
57  
58  
59  
60

1  
2  
3 The Corresponding Author has the right to grant on behalf of all authors and does grant on  
4  
5 behalf of all authors, an exclusive licence (or non-exclusive for UK Crown Employees) on a  
6  
7 worldwide basis to the BMJ Publishing Group Ltd, and its Licensees to permit this article (if  
8  
9 accepted) to be published in BMJ Open and any other BMJPGGL products and to exploit all  
10  
11 subsidiary rights, as set out in our licence.  
12  
13

14  
15 **Keywords:** Ambulance attendances, Distributed lag non-linear model, Morbidity,  
16  
17 Queensland Ambulance Service, Temperature  
18  
19

20 **Word count:**

21  
22  
23 Abstract: 230  
24  
25

26 Main document: 2932  
27  
28

29 Number of Figures: 2  
30  
31

32 Number of Tables: 3  
33  
34  
35  
36  
37  
38  
39  
40  
41  
42  
43  
44  
45  
46  
47  
48  
49  
50  
51  
52  
53  
54  
55  
56  
57  
58  
59  
60

**Article focus:**

- To examine the relationship between exposure to hot and cold temperatures and ambulance attendances.
- To contribute to the literature concerning effects of climate change on non-fatal health outcomes, specifically ambulance attendances.

**Key messages:**

- Hot and cold ambient temperatures affected ambulance attendances for a variety of health outcomes.
- There were differences in the temperature–attendance relationship for different medical conditions.

**Strengths:**

- This study adds to the limited literature examining the effects of temperature on non-fatal health outcomes.
- Ambulance attendance data could be useful for the development of weather/health early warning systems.

**Limitations:**

- Misclassification bias might exist due to non-standardised coding in administrative ambulance data.
- The location of attendance may not always correspond with the location where the patient received the majority of exposure.

## ABSTRACT

### Objectives:

To investigate the effect of hot and cold temperatures on ambulance attendances.

### Design:

An ecological time series study.

### Setting and participants:

The study was conducted in Brisbane, Australia. We collected information on 783 935 daily ambulance attendances, along with data of associated meteorological variables and air pollutants, for the period of 2000–2007.

### Outcome measures:

The total number of ambulance attendances was examined, along with those related to cardiovascular, respiratory and other non-traumatic conditions. Generalised additive models were used to assess the relationship between daily mean temperature and the number of ambulance attendances.

### Results:

There were statistically significant relationships between mean temperature and ambulance attendances for all categories. Acute heat effects were found with a 1.17% (95% CI: 0.86%, 1.48%) increase in total attendances for 1 °C increase above threshold (0–1 days lag). Cold effects were delayed and longer lasting with a 1.30% (0.87%, 1.73%) increase in total attendances for a 1 °C decrease below the threshold (2–15 days lag). Harvesting was observed following initial acute periods of heat effects, but not for cold effects.

**Conclusions:**

This study shows that both hot and cold temperatures led to increases in ambulance attendances for different medical conditions. Our findings support the notion that ambulance attendance records are a valid and timely source of data for use in the development of local weather/health early warning systems.

For peer review only

## INTRODUCTION

The effect of climate change on human health has received much attention in response to projected scenarios of both increasing and more variable global temperatures.[1, 2] It is important to examine these effects as not only will it increase knowledge of the relationships between temperature and human health, but this information will also inform public health policy which seeks to minimise the adverse impacts of climate change on the population, particularly in terms of major chronic conditions such as cardiovascular and respiratory disease.[3]

To date, a large body of research has been devoted to examining the effects of temperature on mortality for different populations, with a particular focus on vulnerable subgroups such as the elderly and frail.[4, 5] Studies have examined the effects of hot and cold temperatures in terms of same-day and extended periods of exposure (e.g., heatwaves), the apparent variation in responses between populations living in different climates, and the presence of lagged responses to exposure.[6–9] Another important area of study relates to the non-linear nature of the temperature–health relationship, which is sometimes interpreted through the existence of temperature ‘comfort zones’, above and below which the health risk due to increasing or decreasing temperature increases dramatically.[10]

As opposed to research into fatal health events, there has been much less attention into research of non-fatal health outcomes. To date, only a few studies have concentrated on hospital and/or emergency department admissions data, collected from either hospital or health department information systems.[11–13] A number of benefits to using non-fatal event data have been suggested, from the ability to conduct more targeted health intervention strategies throughout the community,[14] to the development of early-warning assessment systems.[15–17] In such applications, other forms of morbidity data such as ambulance

1  
2  
3 attendance records have been cited as being potentially useful for the purposes of capturing  
4  
5 those events that, while not leading to immediate death, are important precursors to such  
6  
7 incidents and therefore to effective public health intervention strategies.  
8  
9

10  
11 There have been few attempts to examine the effect of temperature on ambulance  
12  
13 attendances.[18–20] A number of studies have reported a strong relationship between same  
14  
15 day temperature and emergency admissions by ambulance for cerebrovascular disease[21,  
16  
17 22] and respiratory disease.[23] A study of ambulance response calls and extreme heat in  
18  
19 Toronto[24] examined the spatial variation in calls across the city, noting that increased call  
20  
21 rates during hot periods were related to day-of-week factors and associated population  
22  
23 movements. Two recent studies from Toronto[25] and Italy[26] both attempted to quantify  
24  
25 the temperature–ambulance attendance relationship for cardiovascular and respiratory disease  
26  
27 and heat/cold exposure, after controlling for seasonality, air pollution, and day-of-week  
28  
29 factors. They found an increase in ambulance attendances for cardiovascular, respiratory and  
30  
31 other non-traumatic diseases in relation to exposure to temperatures during the summer  
32  
33 period.  
34  
35  
36  
37

38  
39 To date, there exists a lack of research examining the effects of temperature on morbidity,  
40  
41 particularly ambulance attendances, and no studies have been conducted in a sub-tropical  
42  
43 climate to assess both cold and hot temperature effects on ambulance attendances. This study  
44  
45 therefore examined the relationship between ambient temperature and ambulance attendances  
46  
47 in Brisbane, Australia.  
48

## 49 **METHODS**

### 50 **The study population**

51  
52  
53  
54  
55  
56  
57  
58  
59  
60



1  
2  
3 Brisbane is the capital city of Queensland, located on the east coast of Australia (27° 30'  
4 south and 153° 00' east). It has a sub-tropical climate and generally experiences mild winters  
5 and hot summers. The population increased over the study period from 0.88 million in 2000  
6 to 1.01 million in 2007.  
7  
8  
9

10  
11  
12 Data on meteorological factors, air pollution and ambulance attendances in Brisbane,  
13 Australia for the period from 1 January 2000 to 31 December 2007 were obtained from  
14 relevant government agencies. As postcode was the only available geographical location  
15 identifier, a list of postcodes for the City of Brisbane was obtained from the Australian  
16 Bureau of Statistics and Brisbane City Council to define the area and population of the study.  
17  
18  
19  
20  
21  
22  
23

#### 24 **Ambulance attendance data**

25  
26  
27 Anonymised ambulance attendance data were supplied by the Queensland Ambulance  
28 Service (QAS), the main provider of out-of-hospital emergency care and ambulance transport  
29 in Queensland. The variables extracted from each anonymised attendance record were the  
30 date of attendance, sex and age of the patient, postcode of attendance event and the health  
31 assessment of the patient, recorded using a specific coding system. The data were collected  
32 from the ambulance information management system utilised by the QAS. Ethical approval  
33 was obtained prior to the collection of this data.  
34  
35  
36  
37  
38  
39  
40  
41  
42

43  
44 In this study, we calculated the daily number of attendance events for groups of health  
45 assessment codes related to cardiovascular, respiratory or other non-traumatic attendances  
46 that may have been related to ambient temperature exposure.  
47  
48  
49

#### 50 **Exposure data**

51  
52  
53 Daily meteorological data from a central monitoring station were obtained from the Bureau  
54 of Meteorology, which consisted of observations of daily mean temperature (calculated as the  
55  
56  
57  
58  
59  
60

1  
2  
3 average of the daily minimum and maximum temperatures) and humidity. Air pollution data  
4  
5 were obtained from the Department of Environment and Resource Management and  
6  
7 consisted of hourly mean concentrations of ozone (O<sub>3</sub>), nitrogen dioxide (NO<sub>2</sub>), sulphur  
8  
9 dioxide (SO<sub>2</sub>) and particulate matter of size less than 10µm (PM<sub>10</sub>) from eight monitoring  
10  
11 sites throughout Brisbane. Daily mean values were then calculated for all meteorological and  
12  
13 environmental data; when a particular station lacked daily environmental data, the average  
14  
15 across the remaining stations was calculated. Daily mean temperature was used in the  
16  
17 analysis, following several previous studies that have shown it to perform as well as or better  
18  
19 than other temperature measures.[27–29]  
20  
21  
22  
23

### 24 **Statistical analysis**

25  
26  
27 To better understand the nature of the association between ambulance attendances and  
28  
29 temperature, we initially examined the exposure–response curve using generalised additive  
30  
31 models. The relationship between same-day temperature and attendances was analysed using  
32  
33 a natural cubic spline with four degrees of freedom (dfs). The model also adjusted for the  
34  
35 possible confounding effects of humidity, O<sub>3</sub>, NO<sub>2</sub>, SO<sub>2</sub> and PM<sub>10</sub> by using separate cubic  
36  
37 splines with four dfs each. The selection of dfs was based on previous research.[30] To  
38  
39 control for any secular trends and seasonal effects other than temperature, time was  
40  
41 incorporated using a cubic spline with five dfs per year. Effects from both day-of-week and  
42  
43 public holidays were incorporated through dummy variables to control for calendar effects.  
44  
45  
46  
47 To derive specific estimates of heat and cold slopes, we applied a distributed lag non-linear  
48  
49 model (DLNM) with either a “V” or “U” shape linear threshold.[10, 31] This involved  
50  
51 specifying a single or double threshold for temperature, and then estimating a log-linear  
52  
53 change in risk of ambulance attendances above (or below) the hot (or cold) threshold/s. To  
54  
55 examine the nature of delayed effects of temperature on ambulance attendances, a natural  
56  
57  
58  
59  
60

1  
2  
3 cubic spline was used to incorporate lagged effects up to 27 days.[9] An approximate range  
4  
5 for threshold value/s was selected for each attendance group. These ranges were partitioned  
6  
7 into 0.5 °C increments, and the DLNM model was applied iteratively using each value across  
8  
9 the range. The thresholds were then selected based on the model of best fit (lowest deviance)  
10  
11 across the values. Using the DLNM with these thresholds, cold effects (1 °C decrease in  
12  
13 temperature below the threshold) and heat effects (1 °C increase in temperature above the  
14  
15 threshold) were graphically examined across lags. Based on an examination of the general  
16  
17 nature of the exposure–response relationship for lags up to 27 days, parametric effect  
18  
19 estimates were obtained using a lag-stratified approach[10] for the following lag periods: the  
20  
21 average of lag days 0–1, 2–15 and 16–27. Estimates of the percent change in ambulance  
22  
23 attendance corresponded to a 1 °C increase (or decrease) in temperature above (or below) the  
24  
25 threshold/s. There were no missing values in the ambulance attendance data, and very few  
26  
27 missing environmental data after aggregation over all available stations (0.24% temperature  
28  
29 data and 0.44% humidity data). All analyses were conducted in SAS V9.2 and R V2.12.2.  
30  
31  
32  
33

## 34 35 **RESULTS**

36  
37  
38 Figure 1 shows the distribution of attendance events through time for all attendance  
39  
40 categories, meteorological and air pollution variables. A strong, increasing secular trend was  
41  
42 apparent for total attendance events over the study period, with a similar but slightly weaker  
43  
44 trend for cardiovascular and other non-traumatic attendances. A strong seasonal pattern was  
45  
46 observed for respiratory attendances, with increases during the cooler months. A sharp spike  
47  
48 in total attendance events occurred during early 2004, which corresponded to a severe  
49  
50 heatwave in Brisbane at that time.[32] Strong seasonality was observed in temperature, along  
51  
52 with O<sub>3</sub> and NO<sub>2</sub> concentrations, with weaker seasonality present in both relative humidity  
53  
54 and SO<sub>2</sub> concentrations. There was no apparent seasonal pattern for PM<sub>10</sub>.  
55  
56  
57  
58  
59  
60

[Figure 1 here]

Table 1 shows that for the period of study from 2000–2007 there were 783, 935 ambulance attendances, of which 15.3%, 8.7% and 7.1% were cardiovascular, respiratory and other non-traumatic conditions respectively. Daily mean temperature for the period ranged from 9 °C to 34.2 °C.

**Table 1: Summary statistics for daily ambulance attendances, meteorological and air pollution variables in Brisbane, 2000–2007**

| Variable                              | No. days | Mean   | Minimum | 25 <sup>th</sup> Percentile | Median | 75 <sup>th</sup> percentile | Maximum |
|---------------------------------------|----------|--------|---------|-----------------------------|--------|-----------------------------|---------|
| Total (783 935 counts)                | 2922     | 268.3  | 104     | 210                         | 283.5  | 325                         | 432     |
| Cardiovascular (120 041 counts)       | 2922     | 41.1   | 11      | 34                          | 41     | 48                          | 77      |
| Respiratory (68 535 counts)           | 2922     | 23.5   | 3       | 18                          | 23     | 29                          | 62      |
| Other non-traumatic (55 822 counts)   | 2922     | 19.1   | 1       | 12                          | 18     | 25                          | 60      |
| Mean temperature (°C)                 | 2915     | 20.5   | 9       | 17.1                        | 21     | 23.7                        | 34.2    |
| Relative humidity (%)                 | 2909     | 71.4   | 23.8    | 66.3                        | 72.6   | 78.5                        | 96.3    |
| PM <sub>10</sub> (µg/m <sup>3</sup> ) | 2922     | 19.7   | 4.7     | 14.9                        | 18.4   | 22.6                        | 166.8   |
| Ozone (ppm)                           | 2922     | 0.0144 | 0.0014  | 0.0107                      | 0.0137 | 0.0174                      | 0.0353  |
| Sulphur dioxide (ppm)                 | 2922     | 0.0015 | 0       | 0.0009                      | 0.0013 | 0.0019                      | 0.0085  |
| Nitrogen dioxide (ppm)                | 2922     | 0.0116 | 0.0014  | 0.0077                      | 0.0109 | 0.0151                      | 0.0333  |

Table 2 shows the correlation coefficients between all attendances and environmental variables. There exists significant, although weak, correlation between temperature, humidity and air pollutants. Temperature and NO<sub>2</sub> were found to have the strongest correlation across all variables.

**Table 2: Spearman correlations between environmental variables for Brisbane, 2000–2007**

|                  | O3       | PM10     | SO2       | NO2       |
|------------------|----------|----------|-----------|-----------|
| Temperature      | 0.132 ** | 0.033    | -0.162 ** | -0.670 ** |
| O3               |          | 0.106 ** | -0.119 ** | -0.225 ** |
| PM <sub>10</sub> |          |          | 0.273 **  | 0.305 **  |
| SO <sub>2</sub>  |          |          |           | 0.397 **  |

\*\*  $P < 0.001$

1  
2  
3 Through the use of a DLNM with a linear threshold model for temperature, it was found that  
4  
5 the exposure–response relationship for total, cardiovascular and respiratory attendances was  
6  
7 described by a “V” shape with a threshold temperature (of minimum attendance count) of  
8  
9 22 °C. The other non-traumatic attendance group was best described by a “U” shape with a  
10  
11 large comfort zone between 15.5 °C and 28 °C.  
12

13  
14  
15 There were similar patterns of lagged effects of both hot (a 1 °C increase above the threshold)  
16  
17 and cold (a 1 °C decrease below the threshold) temperatures on the number of ambulance  
18  
19 attendances across all groups (Figure 2). Cold effects were found to be delayed, generally  
20  
21 occurring 2–3 days following exposure for all groups. The other non-traumatic attendance  
22  
23 group was an exception, with effects not occurring until approximately 5–8 days after  
24  
25 exposure. The respiratory and other non-traumatic groups also displayed signs of acute cold  
26  
27 effects, although these were not statistically significant. Heat effects were found to be acute  
28  
29 across all groups, occurring within 0–2 days following exposure.  
30  
31

32  
33 [Figure 2 here]  
34  
35

36  
37 We calculated parametric effect estimates for the average of lags 0–1, 2–15 and 15–27 (Table  
38  
39 3). There were significant heat effects over lags 0–1, with a 1 °C increase in temperature  
40  
41 above 22 °C associated with a 1.17% (95% CI: 0.86%, 1.48%) increase in total ambulance  
42  
43 attendances. The largest heat effect found was for the other non-traumatic attendance group,  
44  
45 with a 1 °C increase in temperature resulting in a 20.56% (95% CI: 15.15%, 26.10%)  
46  
47 increase in attendances.  
48

49  
50 We found that the hot effects on all groups displayed characteristics consistent with  
51  
52 harvesting, with a significant decrease in attendances for total (–0.82%, 95% CI: –1.35%, –  
53  
54 0.30%), cardiovascular (–1.85%, 95% CI: –3.06%, –0.64%) and respiratory (–1.99%, 95%  
55  
56  
57  
58  
59  
60

CI: -3.72%, -0.25%) categories over lags 2–15, which followed the immediate increases in ambulance attendance observed over the first few days of exposure.

**Table 3: Temperature effects on ambulance attendances in Brisbane, Australia. Effects given as percent change per 1 °C above or below threshold (Threshold stated in brackets for each category)**

|             | Lag in days | Attendance category (95% C.I) |                             |                             |                             |
|-------------|-------------|-------------------------------|-----------------------------|-----------------------------|-----------------------------|
|             |             | Total (22 °C)                 | Cardiovascular (22 °C)      | Respiratory (22 °C)         | Other (15.5/28 °C)          |
| Heat effect | 0–1         | <b>1.17 (0.86, 1.48)</b>      | 0.45 (-0.26, 1.16)          | -0.38 (-1.40, 0.63)         | <b>20.56 (15.15, 26.10)</b> |
|             | 2–15        | <b>-0.82 (-1.35, -0.30)</b>   | <b>-1.85 (-3.06, -0.64)</b> | <b>-1.99 (-3.72, -0.25)</b> | -12.37 (-27.06, 2.48)       |
|             | 16–27       | -0.47 (-0.97, 0.04)           | -0.35 (-1.51, 0.81)         | -0.72 (-2.38, 0.94)         | 3.19 (-10.30, 16.83)        |
| Cold effect | 0–1         | -0.16 (-0.40, 0.08)           | <b>-0.62 (-1.17, -0.06)</b> | 0.63 (-0.09, 1.34)          | -0.38 (-2.12, 1.38)         |
|             | 2–15        | <b>1.30 (0.87, 1.73)</b>      | <b>1.63 (0.64, 2.62)</b>    | <b>3.65 (2.38, 4.92)</b>    | <b>3.40 (0.43, 6.37)</b>    |
|             | 16–27       | 0.12 (-0.28, 0.53)            | <b>-1.1 (-2.03, -0.16)</b>  | 0.9 (-0.30, 2.11)           | <b>6.49 (3.62, 9.36)</b>    |

Cold effects over lags 2–15 were found for all categories, with the largest increases in attendances associated with respiratory (3.65%, 95% CI: 2.38%, 4.92%), and other non-traumatic (3.40%, 95% CI: 0.43%, 6.37%) groups. The other non-traumatic attendance group also showed significant cold effects from 15 days onward (6.49%, 95% CI: 3.62%, 9.36%). There was no apparent harvesting observed in cold effects, except for the CV group.

## DISCUSSION

In this study, we examined the relationship between temperature and ambulance attendances using time series modelling techniques. Cold and heat effects were observed for all attendance categories. There was a “V” or “U” shaped relationship between daily mean temperature and ambulance attendances, with statistically significant increases in different attendance categories for a 1 °C change in temperature from the thresholds. Cold effects were found to be delayed in onset but last longer than heat effects, which were immediate and short-lived.

There have been few studies of the effects of ambient temperature on ambulance attendances.

A Toronto study[25] reported large increases in ambulance response calls during the summer

1  
2  
3 period. Similarly, a multi-city analysis in Italy[26] found an increasing risk of ambulance  
4  
5 dispatches for increasing temperature, with the largest same-day heat effects occurring for  
6  
7 other non-traumatic and respiratory conditions. However, no cold effect was observed in their  
8  
9 study. The short-term nature of the heat effects in these studies has been observed more  
10  
11 generally. Heat effects on both cardiovascular and respiratory diseases are often observed to  
12  
13 be immediate and short-term,[25, 33] with the strongest heat effects recorded in the first one  
14  
15 to three days following exposure, before decreasing in magnitude.[34] We found similar  
16  
17 trends across all attendance categories, with a heat effect observed immediately following  
18  
19 exposure. In terms of cold temperature effects, we found a significantly increased risk for all  
20  
21 attendance categories. The cold effects on cardiorespiratory attendances are consistent with  
22  
23 most previous studies.[35–37] While this result differs with the those from the Italian  
24  
25 study,[26] based on our results the short exposure lags considered in that study may have  
26  
27 resulted in an underestimation of the cold effect. Our findings of lagged effect of cold  
28  
29 temperatures of up to 15 days following exposure corroborate observations from previous  
30  
31 research.[35, 38]  
32  
33  
34  
35

36  
37 A common pattern across all categories was the slight drop in heat effects between 2 and 15  
38  
39 days, consistent with the harvesting phenomenon found in studies of temperature and  
40  
41 mortality.[6] The occurrence of such an effect has a clear physiological explanation in terms  
42  
43 of fatal health outcomes, however it is less clear as to what would cause this displacement in  
44  
45 out-of-hospital attendances. One factor may be due to an initial large number of transfers and  
46  
47 subsequent admissions of seriously ill patients to hospital. Once there, it would be expected  
48  
49 that such people would spend a number of days in hospital, thereby removing high risk  
50  
51 individuals from the general population that would further utilise ambulance services.  
52  
53  
54

55  
56 An interesting finding was the differences in temperature effects on different categories of  
57  
58 ambulance attendance. In our study, for same-day temperature exposure there was a slight,  
59  
60

1  
2  
3 non-significant decrease and increase in heat effect for respiratory and cardiovascular  
4 attendances, respectively. In particular, the direction of effect on respiratory attendances is in  
5 line with previous results that show a protective effect of hot temperatures on pre-admission  
6 respiratory morbidity.[39] This finding may be due to the fact that in our study, respiratory  
7 tract infections made up a large proportion of respiratory attendances, conditions that are  
8 more prevalent in cooler weather.[23, 36] The other non-traumatic attendance category  
9 displayed a significantly larger heat effect. This is likely a result of either the higher  
10 temperature threshold identified for this sub-group, or the fact it contained a large percentage  
11 of attendances that were related to psychiatric issues, which have been identified as being  
12 strongly influenced by high temperatures.[40]  
13  
14  
15  
16  
17  
18  
19  
20  
21  
22  
23  
24

25  
26 This study has a number of strengths. Firstly, given the current lack of research into  
27 temperature effects on ambulance attendances, the study contributes to an understanding of  
28 how pre-hospital health conditions are affected by changes in temperature. Secondly,  
29 ambulance attendances often occur for conditions that do not require hospital admission nor  
30 cause death. This implies that ambulance attendance data may be useful in surveillance  
31 systems as they provide the ability to monitor health outcomes that will not be captured in  
32 mortality or admissions data.  
33  
34  
35  
36  
37  
38  
39  
40  
41

42 Limitations of the study should also be acknowledged. Firstly, compared to other types of  
43 health outcomes such as mortality, hospital admissions and emergency admissions, the  
44 available coding regime was limited for ambulance attendances and therefore the risk of  
45 misclassification of health outcomes was potentially higher here than for other types of health  
46 outcomes. As the primary purpose of the ambulance data set is for administrative and  
47 performance evaluation purposes, codes are not required at the level of detail seen in a  
48 hospital setting, as a more thorough diagnosis is made once the patient is admitted. Therefore  
49 the relevant attendance categories were necessarily grouped together. Secondly, the postcode  
50  
51  
52  
53  
54  
55  
56  
57  
58  
59  
60



1  
2  
3 variable in our dataset reflected the location of attendance, not the residential area of the  
4 patient. Therefore the location of attendance may not closely correspond with the location  
5 where the patient received the majority of exposure. Finally, the implementation of a new  
6 information system and coding regime in 2006 may have produced some measurement error  
7 in the data. However, sensitivity analyses using data from each year separately and also data  
8 from before the new system was implemented (2000–2005) were found to make little  
9 difference to the results.  
10  
11

12  
13  
14  
15  
16  
17  
18  
19 This research may have several implications, within both the research domain and public  
20 health policy arena. Firstly, this study has shown that the effects of ambient temperature on  
21 ambulance attendances in a sub-tropical climate are similar to those found in both hospital  
22 admissions and mortality data.[5] However, some specific effects on ambulance attendances  
23 were found to differ with those on hospital admissions or mortality, and also between the  
24 different attendance categories; it would therefore be useful to compare different exposure–  
25 response relationships in future research.[18] In terms of public health policy,[24] examining  
26 ambulance attendances rather than admission or mortality data would potentially help to pick  
27 up not only early signs of temperature effects, but also effects on health conditions that  
28 cannot be examined through analysis of mortality and hospital admissions data.  
29  
30  
31  
32  
33  
34  
35  
36  
37  
38  
39  
40  
41

42 This study found significant effects of both cold and hot temperatures and lagged effects of  
43 up to 15 days on cardiorespiratory attendances, which contributes to the currently limited  
44 research of temperature effects on ambulance attendances. The use of ambulance data in  
45 epidemiological research is needed in order to assess a wider range of non-fatal health  
46 outcomes, with its analysis particularly useful in the development of more responsive early  
47 warning and health surveillance systems.  
48  
49  
50  
51  
52  
53  
54  
55  
56  
57  
58  
59  
60

1  
2  
3 **Acknowledgments and grant information:** The authors would like to thank Emma Enraght-  
4  
5 Mooney and Jamie Quinn at the Queensland Ambulance Service (QAS) for their help in  
6  
7 obtaining and analysing the health data. The authors would also like to thank Adrian Barnett  
8  
9 and Yuming Guo for their advice during analysis.  
10

11  
12 **Contributors:** LRT carried out the data analysis and produced the final manuscript. ST was  
13  
14 responsible for the design and coordination of the study, and helped with the preparation and  
15  
16 revision of the manuscript. DC read and revised the manuscript. All authors read and  
17  
18 approved the final manuscript.  
19  
20

21  
22 **Competing interests:** The authors declare they have no competing interests.  
23  
24

25 **Funding:** This research was partly funded by the Australian Research Council (DP1095752  
26  
27 to ST and DC). ST is supported by an NHMRC Research Fellowship (#553043).  
28  
29

30 **Data sharing statement:** No additional data available.  
31  
32  
33  
34  
35  
36  
37  
38  
39  
40  
41  
42  
43  
44  
45  
46  
47  
48  
49  
50  
51  
52  
53  
54  
55  
56  
57  
58  
59  
60

## REFERENCES

- 1 Costello A, Abbas M, Allen A, *et al*. Managing the health effects of climate change:  
2  
3  
4  
5  
6 Lancet and University College London Institute for Global Health Commission. *Lancet*  
7  
8  
9  
10  
11 2009;**373**:1693–733.
- 12  
13  
14 2 Patz JA, Campbell-Lendrum D, Holloway T, *et al*. Impact of regional climate change  
15  
16 on human health. *Nature* 2005;**438**:310–7.
- 17  
18  
19 3 Lin S, Luo M, Walker RJ, *et al*. Extreme high temperatures and hospital admissions  
20  
21 for respiratory and cardiovascular diseases. *Epidemiology* 2009;**20**:738–46.
- 22  
23  
24 4 Barnett AG. Temperature and cardiovascular deaths in the US elderly: changes over  
25  
26 time. *Epidemiology* 2007;**18**:369–72.
- 27  
28  
29 5 Hajat S, Kovats RS, Lachowycz K. Heat-related and cold-related deaths in England  
30  
31 and Wales: who is at risk? *Occup Environ Med* 2007;**64**:93–100.
- 32  
33  
34 6 Yu W, Mengersen K, Hu W, *et al*. Assessing the relationship between global warming  
35  
36 and mortality: lag effects of temperature fluctuations by age and mortality categories.  
37  
38  
39  
40  
41  
42  
43  
44  
45  
46  
47  
48  
49  
50  
51  
52  
53  
54  
55  
56  
57  
58  
59  
60  
*Environ Pollut* 2011;**159**:1789–93.
- 7 Basu R. High ambient temperature and mortality: a review of epidemiologic studies  
from 2001 to 2008. *Environ Health* 2009;**8**:40.
- 8 Martiello MA, Giacchi MV. High temperatures and health outcomes: a review of the  
literature. *Scand J Public Health* 2010;**38**:826–37.
- 9 Guo Y, Barnett AG, Pan X, *et al*. The impact of temperature on mortality in Tianjin,  
China: a case-crossover design with a distributed lag nonlinear model. *Environ Health  
Perspect* 2011;**119**:1719–25.

- 1  
2  
3 10 Armstrong B. Models for the relationship between ambient temperature and daily  
4 mortality. *Epidemiology* 2006;**17**:624–31.  
5  
6  
7  
8 11 Schwartz J, Samet JM, Patz JA. Hospital admissions for heart disease: the effects of  
9 temperature and humidity. *Epidemiology* 2004;**15**:755–61.  
10  
11  
12 12 Liang WM, Liu WP, Chou SY, *et al.* Ambient temperature and emergency room  
13 admissions for acute coronary syndrome in Taiwan. *Int J Biometeorol* 2008;**52**:223–9.  
14  
15  
16 13 Knowlton K, Rotkin-Ellman M, King G, *et al.* The 2006 California heat wave:  
17 impacts on hospitalizations and emergency department visits. *Environ Health Perspect*  
18 2009;**117**:61–7.  
19  
20  
21 14 McGeehin MA, Mirabelli M. The potential impacts of climate variability and change  
22 on temperature-related morbidity and mortality in the United States. *Environ Health Perspect*  
23 2001;**109**:185–9.  
24  
25  
26 15 Bassil KL, Cole DC, Moineddin R, *et al.* Development of a surveillance case  
27 definition for heat-related illness using 911 medical dispatch data. *Can J Public Health*  
28 2008;**99**:339–43.  
29  
30  
31 16 Claessens YE, Taupin P, Kierzek G, *et al.* How emergency departments might alert  
32 for prehospital heat-related excess mortality? *Crit Care* 2006;**10**:R156.  
33  
34  
35 17 English PB, Sinclair AH, Ross Z, *et al.* Environmental health indicators of climate  
36 change for the United States: findings from the State Environmental Health Indicator  
37 Collaborative. *Environ Health Perspect* 2009;**117**:1673–81.  
38  
39  
40  
41  
42  
43  
44  
45  
46  
47  
48  
49  
50  
51  
52  
53  
54  
55  
56  
57  
58  
59  
60

- 1  
2  
3 18 Cerutti B, Tereanu C, Domenighetti G, *et al.* Temperature related mortality and  
4 ambulance service interventions during the heat waves of 2003 in Ticino (Switzerland). *Soz*  
5 *Praventivmed* 2006;**51**:185–93.  
6  
7  
8  
9  
10 19 Palecki MA, Changnon SA, Kunkel KE. The nature and impacts of the July 1999 heat  
11 wave in the midwestern United States: learning from the lessons of 1995. *Bull Amer Meteor*  
12 *Soc* 2001;**82**:1353–67.  
13  
14  
15  
16  
17 20 Nitschke M, Tucker GR, Hansen AL, *et al.* Impact of two recent extreme heat  
18 episodes on morbidity and mortality in Adelaide, South Australia: a case-series analysis.  
19 *Environ Health* 2011;**10**:42.  
20  
21  
22  
23  
24 21 Makie T, Harada M, Kinukawa N, *et al.* Association of meteorological and day-of-  
25 the-week factors with emergency hospital admissions in Fukuoka, Japan. *Int J Biometeorol*  
26 2002;**46**:38–41.  
27  
28  
29  
30  
31  
32 22 Wang H, Matsumura M, Kakehashi M, *et al.* Effects of atmospheric temperature and  
33 pressure on the occurrence of acute myocardial infarction in Hiroshima City, Japan.  
34 *Hiroshima J Med Sci* 2006;**55**:45–51.  
35  
36  
37  
38  
39 23 Abe T, Tokuda Y, Ohde S, *et al.* The relationship of short-term air pollution and  
40 weather to ED visits for asthma in Japan. *Am J Emerg Med* 2009;**27**:153–9.  
41  
42  
43  
44 24 Dolney TJ, Sheridan SC. The relationship between extreme heat and ambulance  
45 response calls for the city of Toronto, Ontario, Canada. *Environ Res* 2006;**101**:94–103.  
46  
47  
48  
49 25 Bassil KL, Cole DC, Moineddin R, *et al.* The relationship between temperature and  
50 ambulance response calls for heat-related illness in Toronto, Ontario, 2005. *J Epidemiol*  
51 *Community Health* 2011;**65**:829–31.  
52  
53  
54  
55  
56  
57  
58  
59  
60

- 1  
2  
3 26 Alessandrini E, Zauli Sajani S, Scotto F, *et al.* Emergency ambulance dispatches and  
4  
5 apparent temperature: a time series analysis in Emilia-Romagna, Italy. *Environ Res*  
6  
7 2011;**111**:1192–200.  
8  
9  
10 27 Barnett AG, Tong S, Clements AC. What measure of temperature is the best predictor  
11  
12 of mortality? *Environ Res* 2010;**110**:604–11.  
13  
14  
15 28 Hajat S, Kosatky T. Heat-related mortality: a review and exploration of heterogeneity.  
16  
17 *J Epidemiol Community Health* 2010;**64**:753–60.  
18  
19  
20 29 Yu W, Vaneckova P, Mengersen K, *et al.* Is the association between temperature and  
21  
22 mortality modified by age, gender and socio-economic status? *Sci Total Environ*  
23  
24 2010;**408**:3513–8.  
25  
26  
27  
28 30 Ren CZ, Williams GM, Tong SL. Does particulate matter modify the association  
29  
30 between temperature and cardiorespiratory diseases? *Environ Health Perspect*  
31  
32 2006;**114**:1690–6.  
33  
34  
35  
36 31 Gasparri A, Armstrong B, Kenward MG. Distributed lag non-linear models. *Stat*  
37  
38 *Med* 2010;**29**:2224–34.  
39  
40  
41 32 Tong SL, Ren CZ, Becker N. Excess deaths during the 2004 heatwave in Brisbane,  
42  
43 Australia. *Int J Biometeorol* 2010;**54**:393–400.  
44  
45  
46 33 Ye X, Wolff R, Yu W, *et al.* Ambient temperature and morbidity: a review of  
47  
48 epidemiological evidence. *Environ Health Perspect* 2012;**120**:19–28.  
49  
50  
51 34 Ostro B, Rauch S, Green R, *et al.* The effects of temperature and use of air  
52  
53 conditioning on hospitalizations. *Am J Epidemiol* 2010;**172**:1053–61.  
54  
55  
56  
57  
58  
59  
60

- 1  
2  
3 35 Hajat S, Haines A. Associations of cold temperatures with GP consultations for  
4 respiratory and cardiovascular disease amongst the elderly in London. *Int J Epidemiol*  
5 2002;**31**:825–30.  
6  
7  
8  
9  
10 36 Falagas ME, Theocharis G, Spanos A, *et al*. Effect of meteorological variables on the  
11 incidence of respiratory tract infections. *Respir Med* 2008;**102**:733–7.  
12  
13  
14 37 Li Y, Du T, Lewin MR, *et al*. The seasonality of acute coronary syndrome and its  
15 relations with climatic parameters. *Am J Emerg Med* 2011;**29**:768–74.  
16  
17  
18  
19  
20 38 Hajat S, Bird W, Haines A. Cold weather and GP consultations for respiratory  
21 conditions by elderly people in 16 locations in the UK. *Eur J Epidemiol* 2004;**19**:959–68.  
22  
23  
24  
25 39 Pudpong N, Hajat S. High temperature effects on out-patient visits and hospital  
26 admissions in Chiang Mai, Thailand. *Sci Total Environ* 2011;**409**:5260–7.  
27  
28  
29  
30 40 Kovats RS, Hajat S. Heat stress and public health: a critical review. *Annu Rev Public*  
31 *Health* 2008;**29**:41–55.  
32  
33  
34  
35  
36  
37  
38  
39  
40  
41  
42  
43  
44  
45  
46  
47  
48  
49  
50  
51  
52  
53  
54  
55  
56  
57  
58  
59  
60

1  
2  
3  
4 **List of Figures:**  
5  
6  
7

8 **Figure 1:** Distributions of ambulance attendance counts, temperature and air pollutants  
9

10 **Figure 2:** Lagged effects for a 1 °C decrease (left) and increase (right) in mean temperature  
11 below (and above) the threshold temperature for total, cardiovascular, respiratory and other  
12 non-traumatic attendances. The shaded region corresponds to the 95% confidence interval  
13  
14  
15  
16  
17  
18  
19  
20  
21  
22  
23  
24  
25  
26  
27  
28  
29  
30  
31  
32  
33  
34  
35  
36  
37  
38  
39  
40  
41  
42  
43  
44  
45  
46  
47  
48  
49  
50  
51  
52  
53  
54  
55  
56  
57  
58  
59  
60



1  
2  
3  
4  
5  
6  
7  
8  
9  
10  
11  
12  
13  
14  
15  
16  
17  
18  
19  
20  
21  
22  
23  
24  
25  
26  
27  
28  
29  
30  
31  
32  
33  
34  
35  
36  
37  
38  
39  
40  
41  
42  
43  
44  
45  
46  
47  
48  
49  
50  
51  
52  
53  
54  
55  
56  
57  
58  
59  
60

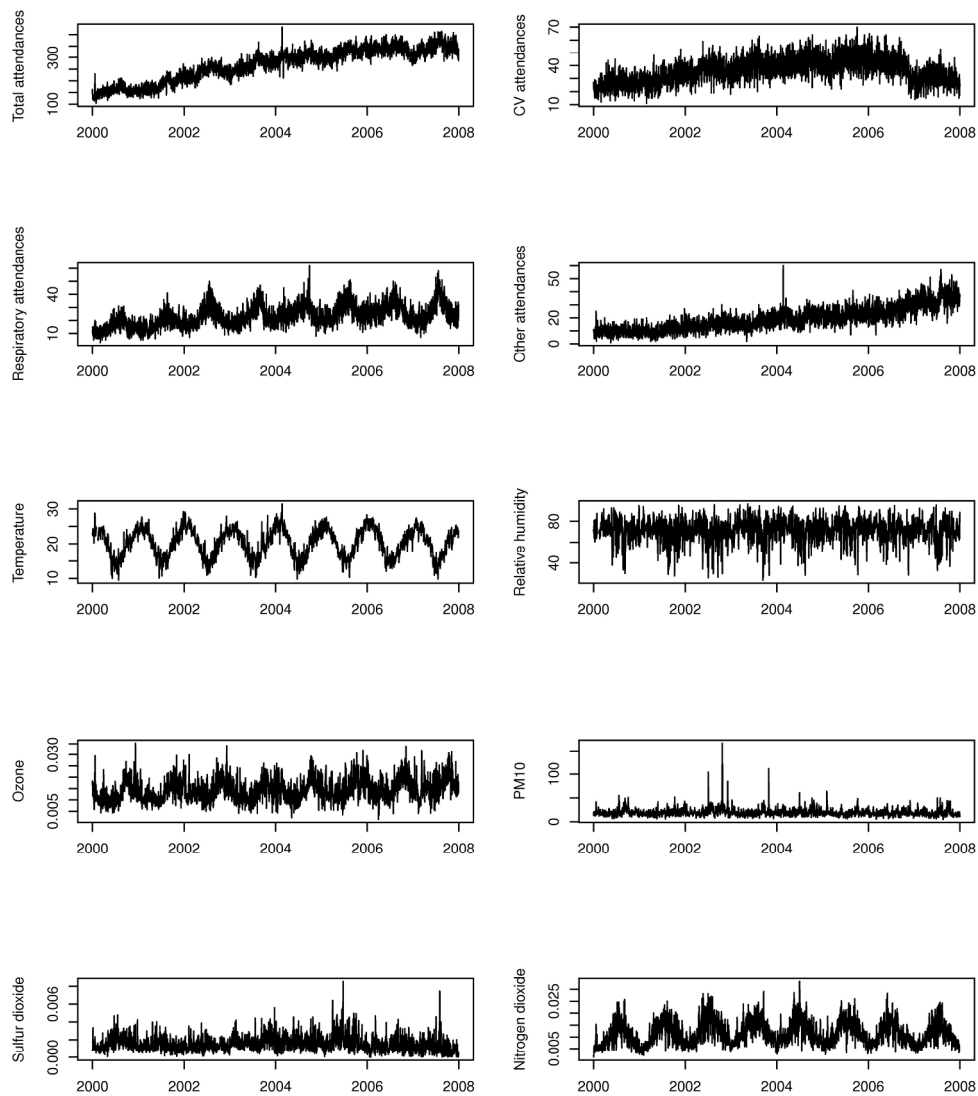

Distributions of ambulance attendance counts, temperature and air pollutants  
235x281mm (300 x 300 DPI)

1  
2  
3  
4  
5  
6  
7  
8  
9  
10  
11  
12  
13  
14  
15  
16  
17  
18  
19  
20  
21  
22  
23  
24  
25  
26  
27  
28  
29  
30  
31  
32  
33  
34  
35  
36  
37  
38  
39  
40  
41  
42  
43  
44  
45  
46  
47  
48  
49  
50  
51  
52  
53  
54  
55  
56  
57  
58  
59  
60

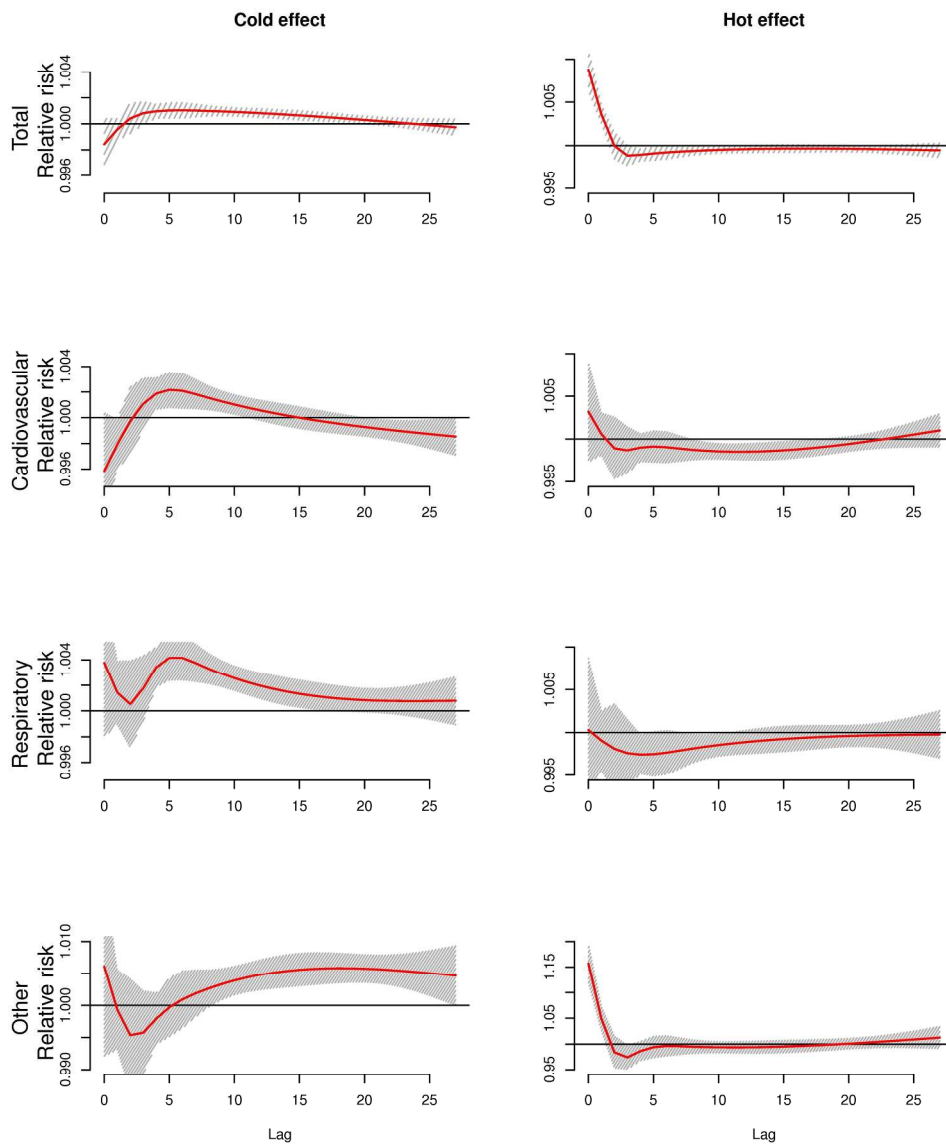

Lagged effects for a 1 °C decrease (left) and increase (right) in mean temperature below (and above) the threshold temperature for total, cardiovascular, respiratory and other non-traumatic attendances. The shaded region corresponds to the 95% confidence interval  
238x288mm (300 x 300 DPI)

STROBE 2007 (v4) Statement—Checklist of items that should be included in reports of *cohort studies*

| Section/Topic                | Item # | Recommendation                                                                                                                                                                       | Reported on page # |
|------------------------------|--------|--------------------------------------------------------------------------------------------------------------------------------------------------------------------------------------|--------------------|
| Title and abstract           | 1      | (a) Indicate the study's design with a commonly used term in the title or the abstract                                                                                               | 1                  |
|                              |        | (b) Provide in the abstract an informative and balanced summary of what was done and what was found                                                                                  | 4–5                |
| <b>Introduction</b>          |        |                                                                                                                                                                                      |                    |
| Background/rationale         | 2      | Explain the scientific background and rationale for the investigation being reported                                                                                                 | 6–7                |
| Objectives                   | 3      | State specific objectives, including any prespecified hypotheses                                                                                                                     | 7                  |
| <b>Methods</b>               |        |                                                                                                                                                                                      |                    |
| Study design                 | 4      | Present key elements of study design early in the paper                                                                                                                              | 8–10               |
| Setting                      | 5      | Describe the setting, locations, and relevant dates, including periods of recruitment, exposure, follow-up, and data collection                                                      | 8–9                |
| Participants                 | 6      | (a) Give the eligibility criteria, and the sources and methods of selection of participants. Describe methods of follow-up                                                           | n/a                |
|                              |        | (b) For matched studies, give matching criteria and number of exposed and unexposed                                                                                                  | n/a                |
| Variables                    | 7      | Clearly define all outcomes, exposures, predictors, potential confounders, and effect modifiers. Give diagnostic criteria, if applicable                                             | 8–9                |
| Data sources/<br>measurement | 8*     | For each variable of interest, give sources of data and details of methods of assessment (measurement). Describe comparability of assessment methods if there is more than one group | 8–9                |
| Bias                         | 9      | Describe any efforts to address potential sources of bias                                                                                                                            | 9, 15              |
| Study size                   | 10     | Explain how the study size was arrived at                                                                                                                                            | 8                  |
| Quantitative variables       | 11     | Explain how quantitative variables were handled in the analyses. If applicable, describe which groupings were chosen and why                                                         | 9                  |
| Statistical methods          | 12     | (a) Describe all statistical methods, including those used to control for confounding                                                                                                | 9–10               |
|                              |        | (b) Describe any methods used to examine subgroups and interactions                                                                                                                  | 9–10               |
|                              |        | (c) Explain how missing data were addressed                                                                                                                                          | n/a                |
|                              |        | (d) If applicable, explain how loss to follow-up was addressed                                                                                                                       | n/a                |
|                              |        | (e) Describe any sensitivity analyses                                                                                                                                                | 16                 |
| <b>Results</b>               |        |                                                                                                                                                                                      |                    |

|                          |     |                                                                                                                                                                                                              |       |
|--------------------------|-----|--------------------------------------------------------------------------------------------------------------------------------------------------------------------------------------------------------------|-------|
| Participants             | 13* | (a) Report numbers of individuals at each stage of study—eg numbers potentially eligible, examined for eligibility, confirmed eligible, included in the study, completing follow-up, and analysed            | n/a   |
|                          |     | (b) Give reasons for non-participation at each stage                                                                                                                                                         | n/a   |
|                          |     | (c) Consider use of a flow diagram                                                                                                                                                                           | n/a   |
| Descriptive data         | 14* | (a) Give characteristics of study participants (eg demographic, clinical, social) and information on exposures and potential confounders                                                                     | 11    |
|                          |     | (b) Indicate number of participants with missing data for each variable of interest                                                                                                                          | 11    |
|                          |     | (c) Summarise follow-up time (eg, average and total amount)                                                                                                                                                  |       |
| Outcome data             | 15* | Report numbers of outcome events or summary measures over time                                                                                                                                               |       |
| Main results             | 16  | (a) Give unadjusted estimates and, if applicable, confounder-adjusted estimates and their precision (eg, 95% confidence interval). Make clear which confounders were adjusted for and why they were included | 13    |
|                          |     | (b) Report category boundaries when continuous variables were categorized                                                                                                                                    | n/a   |
|                          |     | (c) If relevant, consider translating estimates of relative risk into absolute risk for a meaningful time period                                                                                             | n/a   |
| Other analyses           | 17  | Report other analyses done—eg analyses of subgroups and interactions, and sensitivity analyses                                                                                                               | 16    |
| <b>Discussion</b>        |     |                                                                                                                                                                                                              |       |
| Key results              | 18  | Summarise key results with reference to study objectives                                                                                                                                                     | 10–13 |
| <b>Limitations</b>       |     |                                                                                                                                                                                                              |       |
| Interpretation           | 20  | Give a cautious overall interpretation of results considering objectives, limitations, multiplicity of analyses, results from similar studies, and other relevant evidence                                   | 13–15 |
| Generalisability         | 21  | Discuss the generalisability (external validity) of the study results                                                                                                                                        | 15–16 |
| <b>Other information</b> |     |                                                                                                                                                                                                              |       |
| Funding                  | 22  | Give the source of funding and the role of the funders for the present study and, if applicable, for the original study on which the present article is based                                                | 17    |

\*Give information separately for cases and controls in case-control studies and, if applicable, for exposed and unexposed groups in cohort and cross-sectional studies.

**Note:** An Explanation and Elaboration article discusses each checklist item and gives methodological background and published examples of transparent reporting. The STROBE checklist is best used in conjunction with this article (freely available on the Web sites of PLoS Medicine at <http://www.plosmedicine.org/>, Annals of Internal Medicine at <http://www.annals.org/>, and Epidemiology at <http://www.epidem.com/>). Information on the STROBE Initiative is available at [www.strobe-statement.org](http://www.strobe-statement.org).



**Exposure to hot and cold temperatures and ambulance attendances in Brisbane, Australia: A time series study**

|                                 |                                                                                                                                                                                                                                                     |
|---------------------------------|-----------------------------------------------------------------------------------------------------------------------------------------------------------------------------------------------------------------------------------------------------|
| Journal:                        | <i>BMJ Open</i>                                                                                                                                                                                                                                     |
| Manuscript ID:                  | bmjopen-2012-001074.R1                                                                                                                                                                                                                              |
| Article Type:                   | Research                                                                                                                                                                                                                                            |
| Date Submitted by the Author:   | 15-May-2012                                                                                                                                                                                                                                         |
| Complete List of Authors:       | Turner, Lyle; Queensland University of Technology, School of Public Health and Social Work<br>Connell, Des; Griffith University, School of Environment<br>Tong, Shilu; Queensland University of Technology, School of Public Health and Social Work |
| <b>Primary Subject Heading</b>: | Occupational and environmental medicine                                                                                                                                                                                                             |
| Secondary Subject Heading:      | Epidemiology, Health policy, Public health                                                                                                                                                                                                          |
| Keywords:                       | PUBLIC HEALTH, ACCIDENT & EMERGENCY MEDICINE, EPIDEMIOLOGY                                                                                                                                                                                          |
|                                 |                                                                                                                                                                                                                                                     |

SCHOLARONE™  
Manuscripts

Peer Review Only

1  
2  
3  
4  
5  
6  
7 **Type of Manuscript:** Research article

8  
9 **Title:** Exposure to hot and cold temperatures and ambulance attendances in Brisbane,  
10  
11 **Australia: A time series study**

12  
13  
14 **Authors:** Lyle R Turner<sup>1</sup>, Des Connell<sup>2</sup>, Shilu Tong<sup>1</sup>

15  
16 **Author Affiliations:**

- 17  
18  
19 1. School of Public Health and Social Work, Institute of Health and Biomedical Innovation,  
20  
21 Queensland University of Technology, Brisbane, Australia  
22  
23 2. School of Environment, Griffith University, Brisbane, Australia  
24

25  
26 **Corresponding Author:**

27  
28 Dr. Shilu Tong

29  
30 School of Public Health and Social Work, Institute of Health and Biomedical Innovation

31  
32 Queensland University of Technology

33  
34 Victoria Park Road

35  
36 Kelvin Grove, QLD 4059

37  
38 Australia

39  
40 Telephone: +61 7 3138 9745

41  
42 Fax: +61 7 3138 3369

43  
44 Email: s.tong@qut.edu.au  
45  
46  
47  
48  
49  
50  
51  
52  
53  
54  
55  
56  
57  
58  
59  
60

1  
2  
3  
4  
5  
6  
7 The Corresponding Author has the right to grant on behalf of all authors and does grant on  
8 behalf of all authors, an exclusive licence (or non-exclusive for UK Crown Employees) on a  
9 worldwide basis to the BMJ Publishing Group Ltd, and its Licensees to permit this article (if  
10 accepted) to be published in BMJ Open and any other BMJPGGL products and to exploit all  
11 subsidiary rights, as set out in our licence.  
12  
13  
14  
15

16  
17 **Keywords:** Ambulance attendances, Distributed lag non-linear model, Morbidity,  
18 Queensland Ambulance Service, Temperature  
19

20  
21 **Word count:**

22  
23  
24 Abstract: 230  
25

26  
27 Main document: [2947](#)  
28

29 Number of Figures: 2  
30

31 Number of Tables: 3  
32  
33  
34  
35  
36  
37  
38  
39  
40  
41  
42  
43  
44  
45  
46  
47  
48  
49  
50  
51  
52  
53  
54  
55  
56  
57  
58  
59  
60

**Article focus:**

- To examine the relationship between exposure to hot and cold temperatures and ambulance attendances.
- To contribute to the literature concerning effects of climate change on non-fatal health outcomes, specifically ambulance attendances.

**Key messages:**

- Hot and cold ambient temperatures affected ambulance attendances for a variety of health outcomes.
- There were differences in the temperature–attendance relationship for different medical conditions.

**Strengths:**

- This study adds to the limited literature examining the effects of temperature on non-fatal health outcomes.
- Ambulance attendance data could be useful for the development of weather/health early warning systems.

**Limitations:**

- Misclassification bias might exist due to non-standardised coding in administrative ambulance data.
- The location of attendance may not always correspond with the location where the patient received the majority of exposure.



**ABSTRACT****Objectives:**

To investigate the effect of hot and cold temperatures on ambulance attendances.

**Design:**

An ecological time series study.

**Setting and participants:**

The study was conducted in Brisbane, Australia. We collected information on 783 935 daily ambulance attendances, along with data of associated meteorological variables and air pollutants, for the period of 2000–2007.

**Outcome measures:**

The total number of ambulance attendances was examined, along with those related to cardiovascular, respiratory and other non-traumatic conditions. Generalised additive models were used to assess the relationship between daily mean temperature and the number of ambulance attendances.

**Results:**

There were statistically significant relationships between mean temperature and ambulance attendances for all categories. Acute heat effects were found with a 1.17% (95% CI: 0.86%, 1.48%) increase in total attendances for 1 °C increase above threshold (0–1 days lag). Cold effects were delayed and longer lasting with a 1.30% (0.87%, 1.73%) increase in total attendances for a 1 °C decrease below the threshold (2–15 days lag). Harvesting was observed following initial acute periods of heat effects, but not for cold effects.

1  
2  
3  
4  
5  
6  
7  
8  
9  
10  
11  
12  
13  
14  
15  
16  
17  
18  
19  
20  
21  
22  
23  
24  
25  
26  
27  
28  
29  
30  
31  
32  
33  
34  
35  
36  
37  
38  
39  
40  
41  
42  
43  
44  
45  
46  
47  
48  
49  
50  
51  
52  
53  
54  
55  
56  
57  
58  
59  
60

**Conclusions:**

This study shows that both hot and cold temperatures led to increases in ambulance attendances for different medical conditions. Our findings support the notion that ambulance attendance records are a valid and timely source of data for use in the development of local weather/health early warning systems.

For peer review only

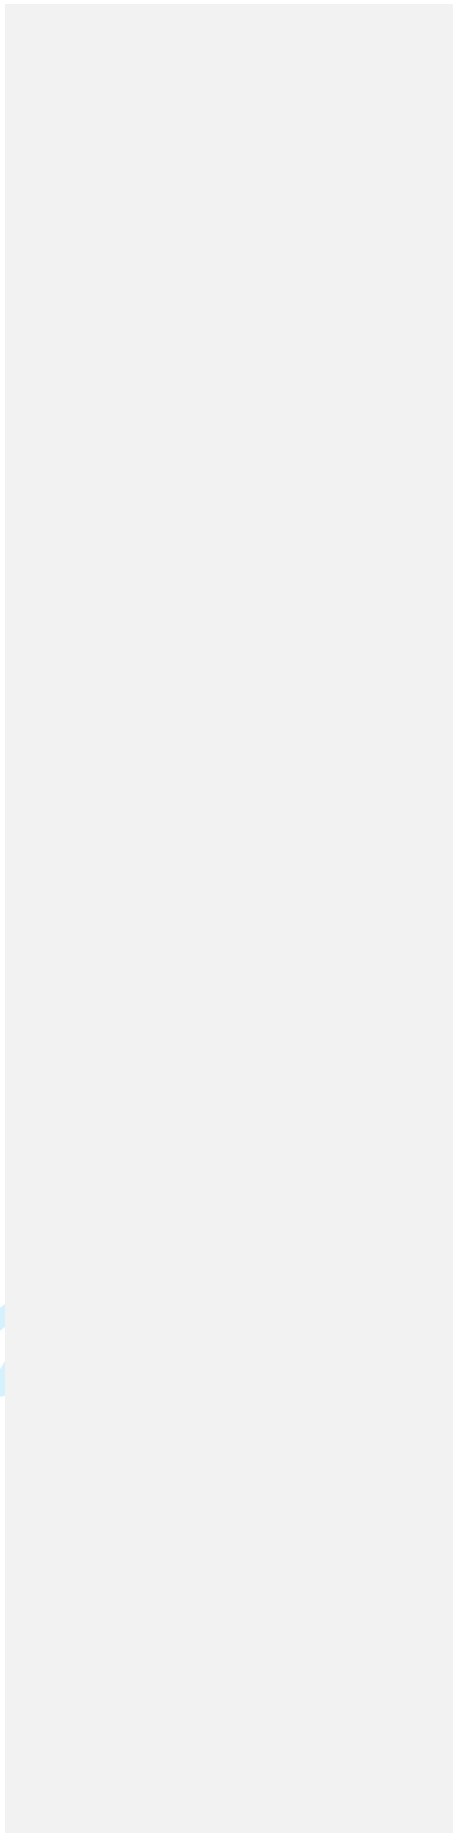

## INTRODUCTION

The effect of climate change on human health has received much attention in response to projected scenarios of both increasing and more variable global temperatures.[1, 2] It is important to examine these effects as not only will it increase knowledge of the relationships between temperature and human health, but this information will also inform public health policy which seeks to minimise the adverse impacts of climate change on the population, particularly in terms of major chronic conditions such as cardiovascular and respiratory disease.[3]

To date, a large body of research has been devoted to examining the effects of temperature on mortality for different populations, with a particular focus on vulnerable subgroups such as the elderly and frail.[4, 5] Studies have examined the effects of hot and cold temperatures in terms of same-day and extended periods of exposure (e.g., heatwaves), the apparent variation in responses between populations living in different climates, and the presence of lagged responses to exposure.[6–9] Another important area of study relates to the non-linear nature of the temperature–health relationship, which is sometimes interpreted through the existence of temperature ‘comfort zones’, above and below which the health risk due to increasing or decreasing temperature increases dramatically.[10]

As opposed to research into fatal health events, there has been much less attention into research of non-fatal health outcomes. To date, only a few studies have concentrated on hospital and/or emergency department admissions data, collected from either hospital or health department information systems.[11–13] A number of benefits to using non-fatal event data have been suggested, from the ability to conduct more targeted health intervention strategies throughout the community,[14] to the development of early-warning assessment systems.[15–17] In such applications, other forms of morbidity data such as ambulance

1  
2  
3  
4  
5  
6  
7 attendance records have been cited as being potentially useful for the purposes of capturing  
8 those events that, while not leading to immediate death, are important precursors to such  
9 incidents and therefore to effective public health intervention strategies.  
10

11  
12 There have been few attempts to examine the effect of temperature on ambulance  
13 attendances.[18–20] A number of studies have reported a strong relationship between same  
14 day temperature and emergency admissions by ambulance for cerebrovascular disease[21, 22]  
15 and respiratory disease.[23] A study of ambulance response calls and extreme heat in  
16 Toronto[24] examined the spatial variation in calls across the city, noting that increased call  
17 rates during hot periods were related to day-of-week factors and associated population  
18 movements. Two recent studies from Toronto[25] and Italy[26] both attempted to quantify  
19 the temperature–ambulance attendance relationship for cardiovascular and respiratory disease  
20 and heat/cold exposure, after controlling for seasonality, air pollution, and day-of-week  
21 factors. They found an increase in ambulance attendances for cardiovascular, respiratory and  
22 other non-traumatic diseases in relation to exposure to temperatures during the summer  
23 period.  
24  
25  
26  
27  
28  
29  
30  
31  
32  
33  
34  
35

36  
37 To date, there exists a lack of research examining the effects of temperature on morbidity,  
38 particularly ambulance attendances, and no studies have been conducted in a sub-tropical  
39 climate to assess both cold and hot temperature effects on ambulance attendances. This study  
40 therefore examined the relationship between ambient temperature and ambulance attendances  
41 in Brisbane, Australia.  
42  
43  
44  
45

## 46 47 **METHODS**

### 48 49 **The study population**

50  
51  
52  
53  
54  
55  
56  
57  
58  
59  
60

1  
2  
3  
4  
5  
6  
7 Brisbane is the capital city of Queensland, located on the east coast of Australia (27° 30'  
8 south and 153° 00' east). It has a sub-tropical climate and generally experiences mild winters  
9  
10 (average minimum and maximum temperature: 9.7 °C, 21.3 °C) and hot summers (average  
11 minimum and maximum temperature: 20.8 °C, 28.7 °C). The population increased over the  
12  
13 study period from 0.88 million in 2000 to 1.01 million in 2007.  
14  
15

16  
17 Data on meteorological factors, air pollution and ambulance attendances in Brisbane,  
18  
19 Australia for the period from 1 January 2000 to 31 December 2007 were obtained from  
20  
21 relevant government agencies. As postcode was the only available geographical location  
22  
23 identifier, a list of postcodes for the City of Brisbane was obtained from the Australian  
24  
25 Bureau of Statistics and Brisbane City Council to define the area and population of the study.  
26

#### 27 **Ambulance attendance data**

28  
29 Anonymised ambulance attendance data were supplied by the Queensland Ambulance  
30  
31 Service (QAS), the main provider of out-of-hospital emergency care and ambulance transport  
32  
33 in Queensland. The variables extracted from each anonymised attendance record were the  
34  
35 date of attendance, sex and age of the patient, postcode of attendance event and the health  
36  
37 assessment of the patient, recorded using a specific coding system. The data were collected  
38  
39 from the ambulance information management system utilised by the QAS. Ethical approval  
40  
41 was obtained prior to the collection of this data.  
42

43  
44 In this study, we calculated the daily number of attendance events for groups of health  
45  
46 assessment codes related to cardiovascular, respiratory or other non-traumatic attendances  
47  
48 that may have been related to ambient temperature exposure.  
49

#### 50 **Exposure data**

1  
2  
3  
4  
5  
6  
7 Daily meteorological data from a central monitoring station were obtained from the Bureau  
8 of Meteorology, which consisted of observations of daily mean temperature (calculated as the  
9 average of the daily minimum and maximum temperatures) and humidity. Air pollution data  
10 were obtained from the Department of Environment and Resource Management and  
11 consisted of hourly mean concentrations of ozone (O<sub>3</sub>), nitrogen dioxide (NO<sub>2</sub>), sulphur  
12 dioxide (SO<sub>2</sub>) and particulate matter of size less than 10µm (PM<sub>10</sub>) from eight monitoring  
13 sites throughout Brisbane. Daily mean values were then calculated for all meteorological and  
14 environmental data; when a particular station lacked daily environmental data, the average  
15 across the remaining stations was calculated. Daily mean temperature was used in the  
16 analysis, following several previous studies that have shown it to perform as well as or better  
17 than other temperature measures.[27–29]

### 28 **Statistical analysis**

30  
31 To better understand the nature of the association between ambulance attendances and  
32 temperature, we initially examined the exposure–response curve using generalised additive  
33 models. The relationship between same-day temperature and attendances was analysed using  
34 a natural cubic spline with four degrees of freedom (dfs). The model also adjusted for the  
35 possible confounding effects of humidity, O<sub>3</sub>, NO<sub>2</sub>, SO<sub>2</sub> and PM<sub>10</sub> by using separate cubic  
36 splines with four dfs each. The selection of dfs was based on previous research.[30] To  
37 control for any secular trends and seasonal effects other than temperature, time was  
38 incorporated using a cubic spline with five dfs per year. Effects from both day-of-week and  
39 public holidays were incorporated through dummy variables to control for calendar effects.

40  
41 To derive specific estimates of heat and cold slopes, we applied a distributed lag non-linear  
42 model (DLNM) with either a “V” or “U” shape linear threshold.[10, 31] This involved  
43 specifying a single or double threshold for temperature, and then estimating a log-linear  
44  
45  
46  
47  
48  
49  
50  
51  
52  
53  
54  
55  
56  
57  
58  
59  
60

1  
2  
3  
4  
5  
6  
7 change in risk of ambulance attendances above (or below) the hot (or cold) threshold/s. To  
8 examine the nature of delayed effects of temperature on ambulance attendances, a natural  
9 cubic spline was used to incorporate lagged effects up to 27 days.[9] An approximate range  
10 for threshold value/s was selected for each attendance group. These ranges were partitioned  
11 into 0.5 °C increments, and the DLNM model was applied iteratively using each value across  
12 the range. The thresholds were then selected based on the model of best fit (lowest deviance)  
13 across the values. Using the DLNM with these thresholds, cold effects (1 °C decrease in  
14 temperature below the threshold) and heat effects (1 °C increase in temperature above the  
15 threshold) were graphically examined across lags. Based on an examination of the general  
16 nature of the exposure–response relationship for lags up to 27 days, parametric effect  
17 estimates were obtained using a lag-stratified approach[10] for the following lag periods: the  
18 average of lag days 0–1, 2–15 and 16–27. Estimates of the percent change in ambulance  
19 attendance corresponded to a 1 °C increase (or decrease) in temperature above (or below) the  
20 threshold/s. There were no missing values in the ambulance attendance data, and very few  
21 missing environmental data after aggregation over all available stations (0.24% temperature  
22 data and 0.44% humidity data). All analyses were conducted in SAS V9.2 and R V2.12.2.

## 37 38 **RESULTS**

39  
40  
41 Figure 1 shows the distribution of attendance events through time for all attendance  
42 categories, meteorological and air pollution variables. A strong, increasing secular trend was  
43 apparent for total attendance events over the study period, with a similar but slightly weaker  
44 trend for cardiovascular and other non-traumatic attendances. A strong seasonal pattern was  
45 observed for respiratory attendances, with increases during the cooler months. A sharp spike  
46 in total attendance events occurred during early 2004, which corresponded to a severe  
47 heatwave in Brisbane at that time.[32] Strong seasonality was observed in temperature, along  
48  
49  
50  
51  
52  
53  
54  
55  
56  
57  
58  
59  
60

with O<sub>3</sub> and NO<sub>2</sub> concentrations, with weaker seasonality present in both relative humidity and SO<sub>2</sub> concentrations. There was no apparent seasonal pattern for PM<sub>10</sub>.

[Figure 1 here]

Table 1 shows that for the period of study from 2000–2007 there were 783, 935 ambulance attendances, of which 15.3%, 8.7% and 7.1% were cardiovascular, respiratory and other non-traumatic conditions respectively. Daily mean temperature for the period ranged from 9 °C to 34.2 °C.

**Table 1: Summary statistics for daily ambulance attendances, meteorological and air pollution variables in Brisbane, 2000–2007**

| Variable                              | No. days | Mean   | Minimum | 25 <sup>th</sup> Percentile | Median | 75 <sup>th</sup> percentile | Maximum |
|---------------------------------------|----------|--------|---------|-----------------------------|--------|-----------------------------|---------|
| Total (783 935 counts)                | 2922     | 268.3  | 104     | 210                         | 283.5  | 325                         | 432     |
| Cardiovascular (120 041 counts)       | 2922     | 41.1   | 11      | 34                          | 41     | 48                          | 77      |
| Respiratory (68 535 counts)           | 2922     | 23.5   | 3       | 18                          | 23     | 29                          | 62      |
| Other non-traumatic (55 822 counts)   | 2922     | 19.1   | 1       | 12                          | 18     | 25                          | 60      |
| Mean temperature (°C)                 | 2915     | 20.5   | 9       | 17.1                        | 21     | 23.7                        | 34.2    |
| Relative humidity (%)                 | 2909     | 71.4   | 23.8    | 66.3                        | 72.6   | 78.5                        | 96.3    |
| PM <sub>10</sub> (µg/m <sup>3</sup> ) | 2922     | 19.7   | 4.7     | 14.9                        | 18.4   | 22.6                        | 166.8   |
| Ozone (ppm)                           | 2922     | 0.0144 | 0.0014  | 0.0107                      | 0.0137 | 0.0174                      | 0.0353  |
| Sulphur dioxide (ppm)                 | 2922     | 0.0015 | 0       | 0.0009                      | 0.0013 | 0.0019                      | 0.0085  |
| Nitrogen dioxide (ppm)                | 2922     | 0.0116 | 0.0014  | 0.0077                      | 0.0109 | 0.0151                      | 0.0333  |

Table 2 shows the correlation coefficients between all attendances and environmental variables. There exists significant, although weak, correlation between temperature, humidity and air pollutants. Temperature and NO<sub>2</sub> were found to have the strongest correlation across all variables.

**Table 2: Spearman correlations between environmental variables for Brisbane, 2000–2007**

|                  | O3       | PM10     | SO2       | NO2       |
|------------------|----------|----------|-----------|-----------|
| Temperature      | 0.132 ** | 0.033    | -0.162 ** | -0.670 ** |
| O3               |          | 0.106 ** | -0.119 ** | -0.225 ** |
| PM <sub>10</sub> |          |          | 0.273 **  | 0.305 **  |
| SO <sub>2</sub>  |          |          |           | 0.397 **  |

\*\*  $P < 0.001$



1  
2  
3  
4  
5  
6  
7  
8  
9 Through the use of a DLNM with a linear threshold model for temperature, it was found that  
10 the exposure–response relationship for total, cardiovascular and respiratory attendances was  
11 described by a “V” shape with a threshold temperature (of minimum attendance count) of  
12 22 °C. The other non-traumatic attendance group was best described by a “U” shape with a  
13 large comfort zone between 15.5 °C and 28 °C.  
14  
15  
16  
17  
18

19 There were similar patterns of lagged effects of both hot (a 1 °C increase above the threshold)  
20 and cold (a 1 °C decrease below the threshold) temperatures on the number of ambulance  
21 attendances across all groups (Figure 2). Cold effects were found to be delayed, generally  
22 occurring 2–3 days following exposure for all groups. The other non-traumatic attendance  
23 group was an exception, with effects not occurring until approximately 5–8 days after  
24 exposure. The respiratory and other non-traumatic groups also displayed signs of acute cold  
25 effects, although these were not statistically significant. Heat effects were found to be acute  
26 across all groups, occurring within 0–2 days following exposure.  
27  
28  
29  
30  
31  
32  
33  
34

35 [Figure 2 here]  
36  
37

38 We calculated parametric effect estimates for the average of lags 0–1, 2–15 and 15–27 (Table  
39 3). There were significant heat effects over lags 0–1, with a 1 °C increase in temperature  
40 above 22 °C associated with a 1.17% (95% CI: 0.86%, 1.48%) increase in total ambulance  
41 attendances. The largest heat effect found was for the other non-traumatic attendance group,  
42 with a 1 °C increase in temperature resulting in a 20.56% (95% CI: 15.15%, 26.10%)  
43 increase in attendances.  
44  
45  
46  
47  
48  
49

50 We found that the hot effects on all groups displayed characteristics consistent with  
51 harvesting, with a significant decrease in attendances for total (–0.82%, 95% CI: –1.35%, –  
52  
53  
54  
55  
56  
57  
58  
59  
60

0.30%), cardiovascular (−1.85%, 95% CI: −3.06%, −0.64%) and respiratory (−1.99%, 95% CI: −3.72%, −0.25%) categories over lags 2–15, which followed the immediate increases in ambulance attendance observed over the first few days of exposure.

**Table 3: Temperature effects on ambulance attendances in Brisbane, Australia. Effects given as percent change per 1 °C above or below threshold (Threshold stated in brackets for each category)**

|             | Lag in days | Attendance category (95% C.I) |                             |                             |                             |
|-------------|-------------|-------------------------------|-----------------------------|-----------------------------|-----------------------------|
|             |             | Total (22 °C)                 | Cardiovascular (22 °C)      | Respiratory (22 °C)         | Other (15.5/28 °C)          |
| Heat effect | 0–1         | <b>1.17 (0.86, 1.48)</b>      | 0.45 (−0.26, 1.16)          | −0.38 (−1.40, 0.63)         | <b>20.56 (15.15, 26.10)</b> |
|             | 2–15        | <b>−0.82 (−1.35, −0.30)</b>   | <b>−1.85 (−3.06, −0.64)</b> | <b>−1.99 (−3.72, −0.25)</b> | −12.37 (−27.06, 2.48)       |
|             | 16–27       | −0.47 (−0.97, 0.04)           | −0.35 (−1.51, 0.81)         | −0.72 (−2.38, 0.94)         | 3.19 (−10.30, 16.83)        |
| Cold effect | 0–1         | −0.16 (−0.40, 0.08)           | <b>−0.62 (−1.17, −0.06)</b> | 0.63 (−0.09, 1.34)          | −0.38 (−2.12, 1.38)         |
|             | 2–15        | <b>1.30 (0.87, 1.73)</b>      | <b>1.63 (0.64, 2.62)</b>    | <b>3.65 (2.38, 4.92)</b>    | <b>3.40 (0.43, 6.37)</b>    |
|             | 16–27       | 0.12 (−0.28, 0.53)            | <b>−1.1 (−2.03, −0.16)</b>  | 0.9 (−0.30, 2.11)           | <b>6.49 (3.62, 9.36)</b>    |

Cold effects over lags 2–15 were found for all categories, with the largest increases in attendances associated with respiratory (3.65%, 95% CI: 2.38%, 4.92%), and other non-traumatic (3.40%, 95% CI: 0.43%, 6.37%) groups. The other non-traumatic attendance group also showed significant cold effects from 15 days onward (6.49%, 95% CI: 3.62%, 9.36%). There was no apparent harvesting observed in cold effects, except for the CV group.

## DISCUSSION

In this study, we examined the relationship between temperature and ambulance attendances using time series modelling techniques. Cold and heat effects were observed for all attendance categories. There was a “V” or “U” shaped relationship between daily mean temperature and ambulance attendances, with statistically significant increases in different attendance categories for a 1 °C change in temperature from the thresholds. Cold effects were found to be delayed in onset but last longer than heat effects, which were immediate and short-lived.

1  
2  
3  
4  
5  
6  
7 There have been few studies of the effects of ambient temperature on ambulance attendances.  
8  
9 A Toronto study[25] reported large increases in ambulance response calls during the summer  
10 period. Similarly, a multi-city analysis in Italy[26] found an increasing risk of ambulance  
11 dispatches for increasing temperature, with the largest same-day heat effects occurring for  
12 other non-traumatic and respiratory conditions. However, no cold effect was observed in their  
13 study. The short-term nature of the heat effects in these studies has been observed more  
14 generally. Heat effects on both cardiovascular and respiratory diseases are often observed to  
15 be immediate and short-term,[25, 33] with the strongest heat effects recorded in the first one  
16 to three days following exposure, before decreasing in magnitude.[34] We found similar  
17 trends across all attendance categories, with a heat effect observed immediately following  
18 exposure. In terms of cold temperature effects, we found a significantly increased risk for all  
19 attendance categories. The cold effects on cardiorespiratory attendances are consistent with  
20 most previous studies.[35–37] While this result differs with the those from the Italian  
21 study,[26] based on our results the short exposure lags considered in that study may have  
22 resulted in an underestimation of the cold effect. Our findings of lagged effect of cold  
23 temperatures of up to 15 days following exposure corroborate observations from previous  
24 research.[35, 38]

25  
26  
27  
28  
29  
30  
31  
32  
33  
34  
35  
36  
37  
38  
39  
40 A common pattern across all categories was the slight drop in heat effects between 2 and 15  
41 days, consistent with the harvesting phenomenon found in studies of temperature and  
42 mortality.[6] The occurrence of such an effect has a clear physiological explanation in terms  
43 of fatal health outcomes, however it is less clear as to what would cause this displacement in  
44 out-of-hospital attendances. One factor may be due to an initial large number of transfers and  
45 subsequent admissions of seriously ill patients to hospital. Once there, it would be expected  
46 that such people would spend a number of days in hospital, thereby removing high risk  
47 individuals from the general population that would further utilise ambulance services.  
48  
49  
50  
51  
52  
53  
54  
55  
56  
57  
58  
59  
60

1  
2  
3  
4  
5  
6  
7 An interesting finding was the differences in temperature effects on different categories of  
8 ambulance attendance. In our study, for same-day temperature exposure there was a slight,  
9 non-significant decrease and increase in heat effect for respiratory and cardiovascular  
10 attendances, respectively. In particular, the direction of effect on respiratory attendances is in  
11 line with previous results that show a protective effect of hot temperatures on pre-admission  
12 respiratory morbidity.[39] This finding may be due to the fact that in our study, respiratory  
13 tract infections made up a large proportion of respiratory attendances, conditions that are  
14 more prevalent in cooler weather.[23, 36] The other non-traumatic attendance category  
15 displayed a significantly larger heat effect. This is likely a result of either the higher  
16 temperature threshold identified for this sub-group, or the fact it contained a large percentage  
17 of attendances that were related to psychiatric issues, which have been identified as being  
18 strongly influenced by high temperatures.[40]  
19

20  
21 This study has a number of strengths. Firstly, given the current lack of research into  
22 temperature effects on ambulance attendances, the study contributes to an understanding of  
23 how pre-hospital health conditions are affected by changes in temperature. Secondly,  
24 ambulance attendances often occur for conditions that do not require hospital admission nor  
25 cause death. This implies that ambulance attendance data may be useful in surveillance  
26 systems as they provide the ability to monitor health outcomes that will not be captured in  
27 mortality or admissions data.  
28

29  
30 Limitations of the study should also be acknowledged. Firstly, compared to other types of  
31 health outcomes such as mortality, hospital admissions and emergency admissions, the  
32 available coding regime was limited for ambulance attendances and therefore the risk of  
33 misclassification of health outcomes was potentially higher here than for other types of health  
34 outcomes. As the primary purpose of the ambulance data set is for administrative and  
35 performance evaluation purposes, codes are not required at the level of detail seen in a  
36  
37  
38  
39  
40  
41  
42  
43  
44  
45  
46  
47  
48  
49  
50  
51  
52  
53  
54  
55  
56  
57  
58  
59  
60

1  
2  
3  
4  
5  
6  
7 hospital setting, as a more thorough diagnosis is made once the patient is admitted. Therefore  
8 the relevant attendance categories were necessarily grouped together. Secondly, the postcode  
9 variable in our dataset reflected the location of attendance, not the residential area of the  
10 patient. Therefore the location of attendance may not closely correspond with the location  
11 where the patient received the majority of exposure. Finally, the implementation of a new  
12 information system and coding regime in 2006 may have produced some measurement error  
13 in the data. However, sensitivity analyses using data from each year separately and also data  
14 from before the new system was implemented (2000–2005) were found to make little  
15 difference to the results.  
16  
17  
18  
19  
20  
21  
22  
23

24 This research may have several implications, within both the research domain and public  
25 health policy arena. Firstly, this study has shown that the effects of ambient temperature on  
26 ambulance attendances in a sub-tropical climate are similar to those found in both hospital  
27 admissions and mortality data.[5] However, some specific effects on ambulance attendances  
28 were found to differ with those on hospital admissions or mortality, and also between the  
29 different attendance categories; it would therefore be useful to compare different exposure–  
30 response relationships in future research.[18] In terms of public health policy,[24] examining  
31 ambulance attendances rather than admission or mortality data would potentially help to pick  
32 up not only early signs of temperature effects, but also effects on health conditions that  
33 cannot be examined through analysis of mortality and hospital admissions data.  
34  
35  
36  
37  
38  
39  
40  
41  
42  
43  
44

45 This study found significant effects of both cold and hot temperatures and lagged effects of  
46 up to 15 days on cardiorespiratory attendances, which contributes to the currently limited  
47 research of temperature effects on ambulance attendances. The use of ambulance data in  
48 epidemiological research is needed in order to assess a wider range of non-fatal health  
49 outcomes, with its analysis particularly useful in the development of more responsive early  
50 warning and health surveillance systems.  
51  
52  
53  
54  
55  
56  
57  
58  
59  
60

1  
2  
3  
4  
5  
6  
7  
8  
9  
10  
11  
12  
13  
14  
15  
16  
17  
18  
19  
20  
21  
22  
23  
24  
25  
26  
27  
28  
29  
30  
31  
32  
33  
34  
35  
36  
37  
38  
39  
40  
41  
42  
43  
44  
45  
46  
47  
48  
49  
50  
51  
52  
53  
54  
55  
56  
57  
58  
59  
60

For peer review only

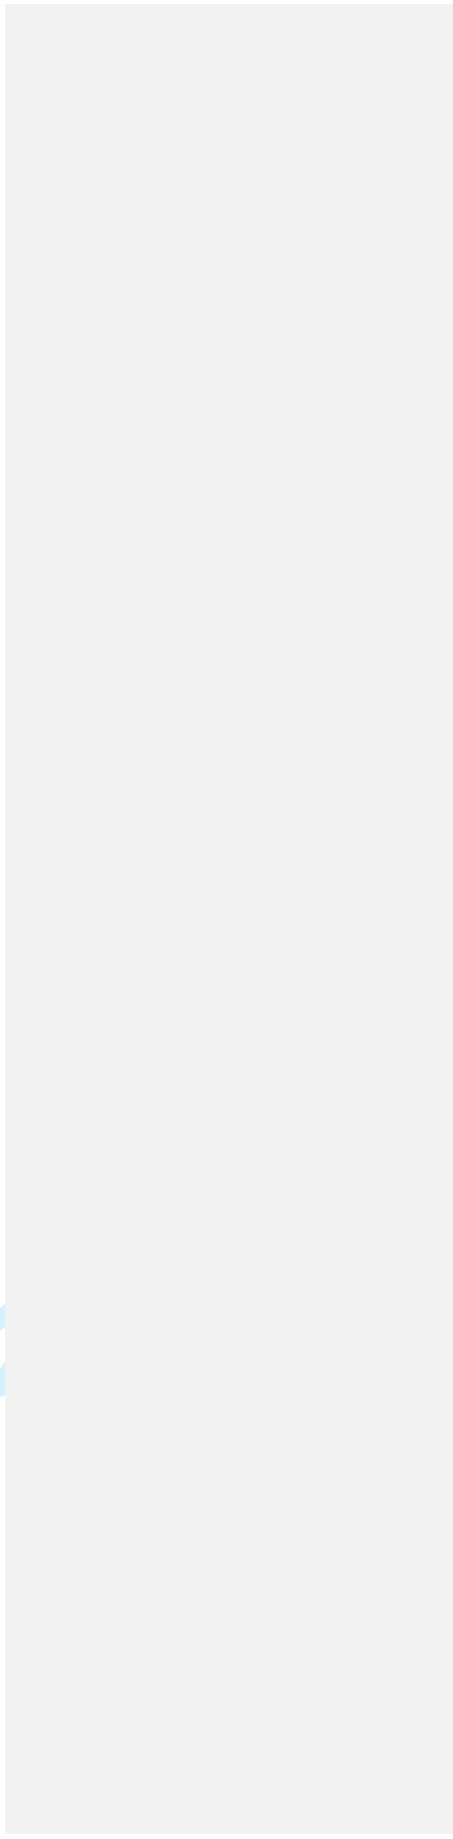

1  
2  
3  
4  
5  
6  
7 **Acknowledgments and grant information:** The authors would like to thank Emma Enraght-  
8 Mooney and Jamie Quinn at the Queensland Ambulance Service (QAS) for their help in  
9 obtaining and analysing the health data. The authors would also like to thank Adrian Barnett  
10 and Yuming Guo for their advice during analysis.  
11  
12

13  
14  
15 **Contributors:** LRT carried out the data analysis and produced the final manuscript. ST was  
16 responsible for the design and coordination of the study, and helped with the preparation and  
17 revision of the manuscript. DC read and revised the manuscript. All authors read and  
18 approved the final manuscript.  
19  
20  
21

22  
23 **Competing interests:** The authors declare they have no competing interests.  
24

25  
26 **Funding:** This research was partly funded by the Australian Research Council (DP1095752  
27 to ST and DC). ST is supported by an NHMRC Research Fellowship (#553043).  
28  
29

30 **Data sharing statement:** No additional data available.  
31  
32  
33  
34  
35  
36  
37  
38  
39  
40  
41  
42  
43  
44  
45  
46  
47  
48  
49  
50  
51  
52  
53  
54  
55  
56  
57  
58  
59  
60

## REFERENCES

- 1 Costello A, Abbas M, Allen A, *et al.* Managing the health effects of climate change: Lancet and University College London Institute for Global Health Commission. *Lancet* 2009;**373**:1693–733.
- 2 Patz JA, Campbell-Lendrum D, Holloway T, *et al.* Impact of regional climate change on human health. *Nature* 2005;**438**:310–7.
- 3 Lin S, Luo M, Walker RJ, *et al.* Extreme high temperatures and hospital admissions for respiratory and cardiovascular diseases. *Epidemiology* 2009;**20**:738–46.
- 4 Barnett AG. Temperature and cardiovascular deaths in the US elderly: changes over time. *Epidemiology* 2007;**18**:369–72.
- 5 Hajat S, Kovats RS, Lachowycz K. Heat-related and cold-related deaths in England and Wales: who is at risk? *Occup Environ Med* 2007;**64**:93–100.
- 6 Yu W, Mengersen K, Hu W, *et al.* Assessing the relationship between global warming and mortality: lag effects of temperature fluctuations by age and mortality categories. *Environ Pollut* 2011;**159**:1789–93.
- 7 Basu R. High ambient temperature and mortality: a review of epidemiologic studies from 2001 to 2008. *Environ Health* 2009;**8**:40.
- 8 Martiello MA, Giacchi MV. High temperatures and health outcomes: a review of the literature. *Scand J Public Health* 2010;**38**:826–37.
- 9 Guo Y, Barnett AG, Pan X, *et al.* The impact of temperature on mortality in Tianjin, China: a case-crossover design with a distributed lag nonlinear model. *Environ Health Perspect* 2011;**119**:1719–25.

Formatted: French (France)



1  
2  
3  
4  
5  
6  
7 10 Armstrong B. Models for the relationship between ambient temperature and daily  
8 mortality. *Epidemiology* 2006;**17**:624–31.

9  
10  
11 11 Schwartz J, Samet JM, Patz JA. Hospital admissions for heart disease: the effects of  
12 temperature and humidity. *Epidemiology* 2004;**15**:755–61.

Formatted: French (France)

13  
14  
15  
16 12 Liang WM, Liu WP, Chou SY, *et al.* Ambient temperature and emergency room  
17 admissions for acute coronary syndrome in Taiwan. *Int J Biometeorol* 2008;**52**:223–9.

18  
19  
20  
21 13 Knowlton K, Rotkin-Ellman M, King G, *et al.* The 2006 California heat wave:  
22 impacts on hospitalizations and emergency department visits. *Environ Health Perspect*  
23 2009;**117**:61–7.

24  
25  
26  
27 14 McGeehin MA, Mirabelli M. The potential impacts of climate variability and change  
28 on temperature-related morbidity and mortality in the United States. *Environ Health Perspect*  
29 2001;**109**:185–9.

30  
31  
32  
33 15 Bassil KL, Cole DC, Moineddin R, *et al.* Development of a surveillance case  
34 definition for heat-related illness using 911 medical dispatch data. *Can J Public Health*  
35 2008;**99**:339–43.

36  
37  
38  
39 16 Claessens YE, Taupin P, Kierzek G, *et al.* How emergency departments might alert  
40 for prehospital heat-related excess mortality? *Crit Care* 2006;**10**:R156.

41  
42  
43  
44 17 English PB, Sinclair AH, Ross Z, *et al.* Environmental health indicators of climate  
45 change for the United States: findings from the State Environmental Health Indicator  
46 Collaborative. *Environ Health Perspect* 2009;**117**:1673–81.  
47  
48  
49  
50  
51  
52  
53  
54  
55  
56  
57  
58  
59  
60

- 1  
2  
3  
4  
5  
6  
7 18 Cerutti B, Tereanu C, Domenighetti G, *et al.* Temperature related mortality and  
8 ambulance service interventions during the heat waves of 2003 in Ticino (Switzerland). *Soz*  
9 *Praventivmed* 2006;**51**:185–93.  
10  
11  
12  
13 19 Palecki MA, Changnon SA, Kunkel KE. The nature and impacts of the July 1999 heat  
14 wave in the midwestern United States: learning from the lessons of 1995. *Bull Amer Meteor*  
15 *Soc* 2001;**82**:1353–67.  
16  
17  
18  
19 20 Nitschke M, Tucker GR, Hansen AL, *et al.* Impact of two recent extreme heat  
20 episodes on morbidity and mortality in Adelaide, South Australia: a case-series analysis.  
21 *Environ Health* 2011;**10**:42.  
22  
23  
24  
25  
26 21 Makie T, Harada M, Kinukawa N, *et al.* Association of meteorological and day-of-  
27 the-week factors with emergency hospital admissions in Fukuoka, Japan. *Int J Biometeorol*  
28 2002;**46**:38–41.  
29  
30  
31  
32 22 Wang H, Matsumura M, Kakehashi M, *et al.* Effects of atmospheric temperature and  
33 pressure on the occurrence of acute myocardial infarction in Hiroshima City, Japan.  
34 *Hiroshima J Med Sci* 2006;**55**:45–51.  
35  
36  
37  
38  
39 23 Abe T, Tokuda Y, Ohde S, *et al.* The relationship of short-term air pollution and  
40 weather to ED visits for asthma in Japan. *Am J Emerg Med* 2009;**27**:153–9.  
41  
42  
43  
44 24 Dolney TJ, Sheridan SC. The relationship between extreme heat and ambulance  
45 response calls for the city of Toronto, Ontario, Canada. *Environ Res* 2006;**101**:94–103.  
46  
47  
48 25 Bassil KL, Cole DC, Moineddin R, *et al.* The relationship between temperature and  
49 ambulance response calls for heat-related illness in Toronto, Ontario, 2005. *J Epidemiol*  
50 *Community Health* 2011;**65**:829–31.  
51  
52  
53  
54  
55  
56  
57  
58  
59  
60

Formatted: French (France)

- 1  
2  
3  
4  
5  
6  
7 26 Alessandrini E, Zauli Sajani S, Scotto F, *et al.* Emergency ambulance dispatches and  
8 apparent temperature: a time series analysis in Emilia-Romagna, Italy. *Environ Res*  
9 2011;**111**:1192–200.  
10  
11  
12  
13 27 Barnett AG, Tong S, Clements AC. What measure of temperature is the best predictor  
14 of mortality? *Environ Res* 2010;**110**:604–11.  
15  
16  
17 28 Hajat S, Kosatky T. Heat-related mortality: a review and exploration of heterogeneity.  
18 *J Epidemiol Community Health* 2010;**64**:753–60.  
19  
20  
21  
22 29 Yu W, Vaneckova P, Mengersen K, *et al.* Is the association between temperature and  
23 mortality modified by age, gender and socio-economic status? *Sci Total Environ*  
24 2010;**408**:3513–8.  
25  
26  
27  
28 30 Ren CZ, Williams GM, Tong SL. Does particulate matter modify the association  
29 between temperature and cardiorespiratory diseases? *Environ Health Perspect*  
30 2006;**114**:1690–6.  
31  
32  
33  
34 31 Gasparrini A, Armstrong B, Kenward MG. Distributed lag non-linear models. *Stat*  
35 *Med* 2010;**29**:2224–34.  
36  
37  
38  
39 32 Tong SL, Ren CZ, Becker N. Excess deaths during the 2004 heatwave in Brisbane,  
40 Australia. *Int J Biometeorol* 2010;**54**:393–400.  
41  
42  
43  
44 33 Ye X, Wolff R, Yu W, *et al.* Ambient temperature and morbidity: a review of  
45 epidemiological evidence. *Environ Health Perspect* 2012;**120**:19–28.  
46  
47  
48  
49 34 Ostro B, Rauch S, Green R, *et al.* The effects of temperature and use of air  
50 conditioning on hospitalizations. *Am J Epidemiol* 2010;**172**:1053–61.  
51  
52  
53  
54  
55  
56  
57  
58  
59  
60

1  
2  
3  
4  
5  
6  
7 35 Hajat S, Haines A. Associations of cold temperatures with GP consultations for  
8 respiratory and cardiovascular disease amongst the elderly in London. *Int J Epidemiol*  
9 2002;**31**:825–30.  
10

11  
12  
13 36 Falagas ME, Theocharis G, Spanos A, *et al.* Effect of meteorological variables on the  
14 incidence of respiratory tract infections. *Respir Med* 2008;**102**:733–7.

Formatted: French (France)

15  
16  
17 37 Li Y, Du T, Lewin MR, *et al.* The seasonality of acute coronary syndrome and its  
18 relations with climatic parameters. *Am J Emerg Med* 2011;**29**:768–74.  
19

20  
21  
22 38 Hajat S, Bird W, Haines A. Cold weather and GP consultations for respiratory  
23 conditions by elderly people in 16 locations in the UK. *Eur J Epidemiol* 2004;**19**:959–68.  
24  
25

26  
27 39 Pudpong N, Hajat S. High temperature effects on out-patient visits and hospital  
28 admissions in Chiang Mai, Thailand. *Sci Total Environ* 2011;**409**:5260–7.  
29

30  
31 40 Kovats RS, Hajat S. Heat stress and public health: a critical review. *Annu Rev Public*  
32 *Health* 2008;**29**:41–55.  
33  
34  
35  
36  
37  
38  
39  
40  
41  
42  
43  
44  
45  
46  
47  
48  
49  
50  
51  
52  
53  
54  
55  
56  
57  
58  
59  
60

1  
2  
3  
4  
5  
6  
7  
8 **List of Figures:**  
9

10  
11 **Figure 1:** Distributions of ambulance attendance counts, temperature and air pollutants

12  
13 **Figure 2:** Lagged effects for a 1 °C decrease (left) and increase (right) in mean temperature  
14 below (and above) the threshold temperature for total, cardiovascular, respiratory and other  
15 non-traumatic attendances. The shaded region corresponds to the 95% confidence interval  
16  
17  
18  
19  
20  
21  
22  
23  
24  
25  
26  
27  
28  
29  
30  
31  
32  
33  
34  
35  
36  
37  
38  
39  
40  
41  
42  
43  
44  
45  
46  
47  
48  
49  
50  
51  
52  
53  
54  
55  
56  
57  
58  
59  
60

1  
2  
3  
4  
5  
6  
7  
8  
9  
10  
11  
12  
13  
14  
15  
16  
17  
18  
19  
20  
21  
22  
23  
24  
25  
26  
27  
28  
29  
30  
31  
32  
33  
34  
35  
36  
37  
38  
39  
40  
41  
42  
43  
44  
45  
46  
47  
48  
49  
50  
51  
52  
53  
54  
55  
56  
57  
58  
59  
60

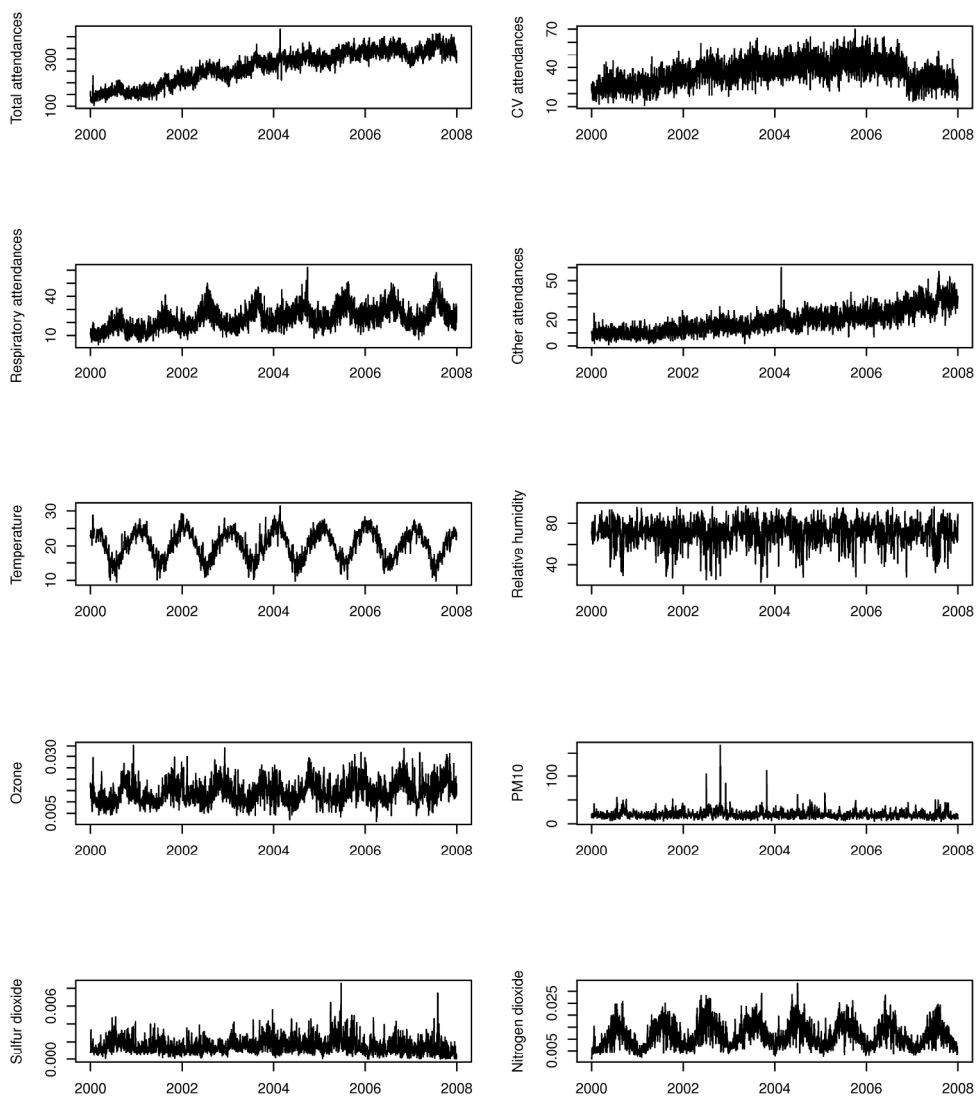

Distributions of ambulance attendance counts, temperature and air pollutants  
235x281mm (300 x 300 DPI)

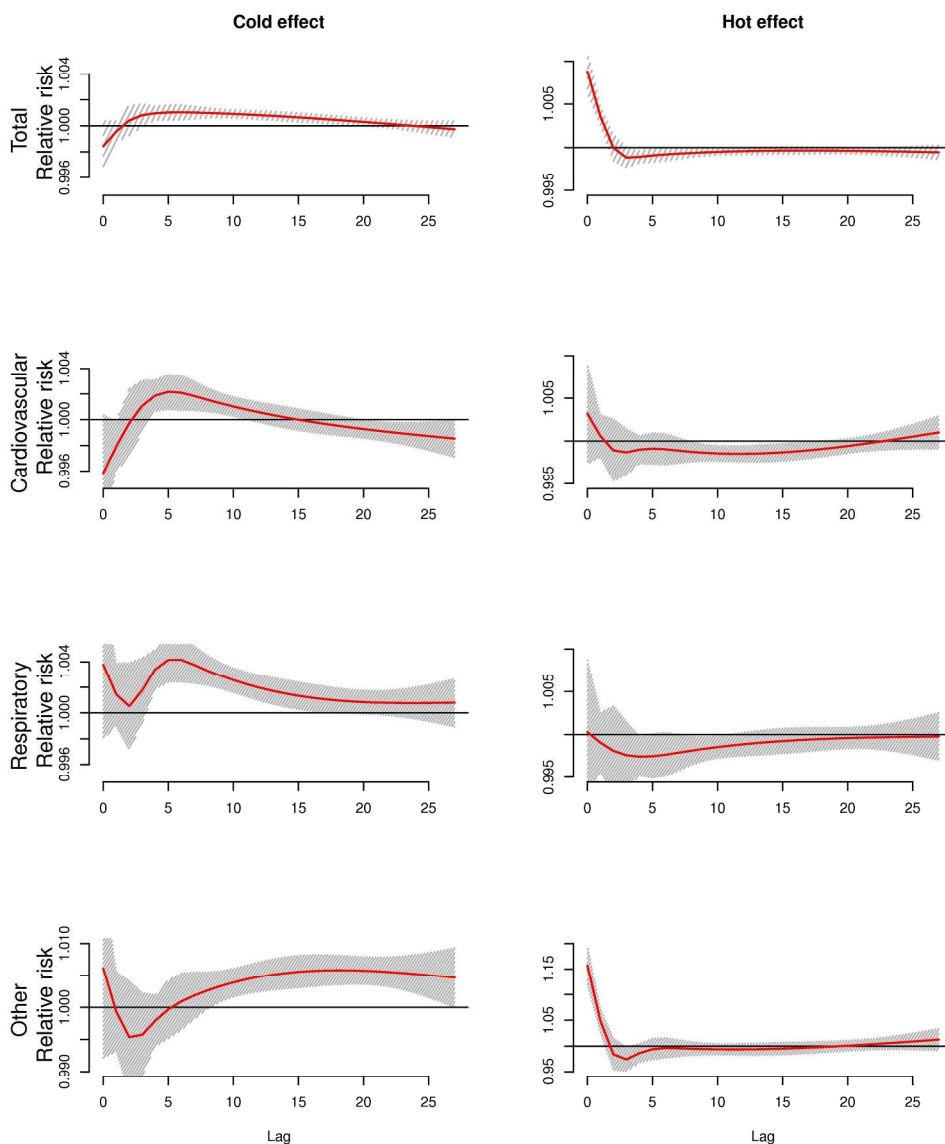

Lagged effects for a 1 °C decrease (left) and increase (right) in mean temperature below (and above) the threshold temperature for total, cardiovascular, respiratory and other non-traumatic attendances. The shaded region corresponds to the 95% confidence interval  
 238x288mm (300 x 300 DPI)

Table 3: Unadjusted temperature effects on ambulance attendances in Brisbane, Australia. Effects given as percent change per 1 °C above or below threshold (Threshold stated in brackets for each category)

|             | Lag in days | Attendance category (95% C.I) |                          |                          |                               |
|-------------|-------------|-------------------------------|--------------------------|--------------------------|-------------------------------|
|             |             | Total (22 °C)                 | Cardiovascular (22 °C)   | Respiratory (22 °C)      | Other (15.5/28 °C)            |
| Heat effect | 0-1         | <b>1.51 (0.54, 2.49)</b>      | 0.81 (-0.15, 1.77)       | 0.29 (-0.93, 1.51)       | <b>23.52 (13.23, 34.31)</b>   |
|             | 2-15        | -0.49 (-1.96, 0.99)           | -1.25 (-2.70, 0.21)      | -1.16 (-3.00, 0.69)      | <b>-27.55 (-53.20, -1.41)</b> |
|             | 16-27       | 1.02 (-0.21, 2.24)            | 1.12 (-0.09, 2.33)       | <b>1.89 (0.36, 3.43)</b> | -0.95 (-23.62, 22.16)         |
| Cold effect | 0-1         | -0.57 (-1.27, 0.14)           | -0.68 (-1.36, 0.01)      | -0.03 (-0.81, 0.75)      | <b>-3.52 (-6.61, -0.39)</b>   |
|             | 2-15        | 0.86 (-0.22, 1.93)            | <b>1.71 (0.66, 2.76)</b> | <b>3.83 (2.63, 5.02)</b> | -0.97 (-5.82, 3.89)           |
|             | 16-27       | <b>1.10 (0.26, 1.93)</b>      | 0.08 (-0.73, 0.90)       | <b>2.79 (1.86, 3.72)</b> | <b>5.81 (1.60, 10.03)</b>     |



STROBE 2007 (v4) Statement—Checklist of items that should be included in reports of *cohort studies*

| Section/Topic                | Item # | Recommendation                                                                                                                                                                       | Reported on page # |
|------------------------------|--------|--------------------------------------------------------------------------------------------------------------------------------------------------------------------------------------|--------------------|
| Title and abstract           | 1      | (a) Indicate the study's design with a commonly used term in the title or the abstract                                                                                               | 1                  |
|                              |        | (b) Provide in the abstract an informative and balanced summary of what was done and what was found                                                                                  | 4–5                |
| <b>Introduction</b>          |        |                                                                                                                                                                                      |                    |
| Background/rationale         | 2      | Explain the scientific background and rationale for the investigation being reported                                                                                                 | 6–7                |
| Objectives                   | 3      | State specific objectives, including any prespecified hypotheses                                                                                                                     | 7                  |
| <b>Methods</b>               |        |                                                                                                                                                                                      |                    |
| Study design                 | 4      | Present key elements of study design early in the paper                                                                                                                              | 8–10               |
| Setting                      | 5      | Describe the setting, locations, and relevant dates, including periods of recruitment, exposure, follow-up, and data collection                                                      | 8–9                |
| Participants                 | 6      | (a) Give the eligibility criteria, and the sources and methods of selection of participants. Describe methods of follow-up                                                           | n/a                |
|                              |        | (b) For matched studies, give matching criteria and number of exposed and unexposed                                                                                                  | n/a                |
| Variables                    | 7      | Clearly define all outcomes, exposures, predictors, potential confounders, and effect modifiers. Give diagnostic criteria, if applicable                                             | 8–9                |
| Data sources/<br>measurement | 8*     | For each variable of interest, give sources of data and details of methods of assessment (measurement). Describe comparability of assessment methods if there is more than one group | 8–9                |
| Bias                         | 9      | Describe any efforts to address potential sources of bias                                                                                                                            | 9, 15              |
| Study size                   | 10     | Explain how the study size was arrived at                                                                                                                                            | 8                  |
| Quantitative variables       | 11     | Explain how quantitative variables were handled in the analyses. If applicable, describe which groupings were chosen and why                                                         | 9                  |
| Statistical methods          | 12     | (a) Describe all statistical methods, including those used to control for confounding                                                                                                | 9–10               |
|                              |        | (b) Describe any methods used to examine subgroups and interactions                                                                                                                  | 9–10               |
|                              |        | (c) Explain how missing data were addressed                                                                                                                                          | n/a                |
|                              |        | (d) If applicable, explain how loss to follow-up was addressed                                                                                                                       | n/a                |
|                              |        | (e) Describe any sensitivity analyses                                                                                                                                                | 16                 |
| <b>Results</b>               |        |                                                                                                                                                                                      |                    |

|                          |     |                                                                                                                                                                                                              |       |
|--------------------------|-----|--------------------------------------------------------------------------------------------------------------------------------------------------------------------------------------------------------------|-------|
| Participants             | 13* | (a) Report numbers of individuals at each stage of study—eg numbers potentially eligible, examined for eligibility, confirmed eligible, included in the study, completing follow-up, and analysed            | n/a   |
|                          |     | (b) Give reasons for non-participation at each stage                                                                                                                                                         | n/a   |
|                          |     | (c) Consider use of a flow diagram                                                                                                                                                                           | n/a   |
| Descriptive data         | 14* | (a) Give characteristics of study participants (eg demographic, clinical, social) and information on exposures and potential confounders                                                                     | 11    |
|                          |     | (b) Indicate number of participants with missing data for each variable of interest                                                                                                                          | 11    |
|                          |     | (c) Summarise follow-up time (eg, average and total amount)                                                                                                                                                  |       |
| Outcome data             | 15* | Report numbers of outcome events or summary measures over time                                                                                                                                               |       |
| Main results             | 16  | (a) Give unadjusted estimates and, if applicable, confounder-adjusted estimates and their precision (eg, 95% confidence interval). Make clear which confounders were adjusted for and why they were included | 13    |
|                          |     | (b) Report category boundaries when continuous variables were categorized                                                                                                                                    | n/a   |
|                          |     | (c) If relevant, consider translating estimates of relative risk into absolute risk for a meaningful time period                                                                                             | n/a   |
| Other analyses           | 17  | Report other analyses done—eg analyses of subgroups and interactions, and sensitivity analyses                                                                                                               | 16    |
| <b>Discussion</b>        |     |                                                                                                                                                                                                              |       |
| Key results              | 18  | Summarise key results with reference to study objectives                                                                                                                                                     | 10–13 |
| <b>Limitations</b>       |     |                                                                                                                                                                                                              |       |
| Interpretation           | 20  | Give a cautious overall interpretation of results considering objectives, limitations, multiplicity of analyses, results from similar studies, and other relevant evidence                                   | 13–15 |
| Generalisability         | 21  | Discuss the generalisability (external validity) of the study results                                                                                                                                        | 15–16 |
| <b>Other information</b> |     |                                                                                                                                                                                                              |       |
| Funding                  | 22  | Give the source of funding and the role of the funders for the present study and, if applicable, for the original study on which the present article is based                                                | 17    |

\*Give information separately for cases and controls in case-control studies and, if applicable, for exposed and unexposed groups in cohort and cross-sectional studies.

**Note:** An Explanation and Elaboration article discusses each checklist item and gives methodological background and published examples of transparent reporting. The STROBE checklist is best used in conjunction with this article (freely available on the Web sites of PLoS Medicine at <http://www.plosmedicine.org/>, Annals of Internal Medicine at <http://www.annals.org/>, and Epidemiology at <http://www.epidem.com/>). Information on the STROBE Initiative is available at [www.strobe-statement.org](http://www.strobe-statement.org).
